# Supplementary material for: Phytochemical Profiling, Antioxidant and Cognitive-Enhancing Effect of Helichrysum italicum ssp. italicum (Roth) G. Don (Asteraceae)
Source: MDPI journal article supplement (doi:10.3390/plants12152755), 2023-07-25
Supplement: s1 [file s1]

## Supplementary material

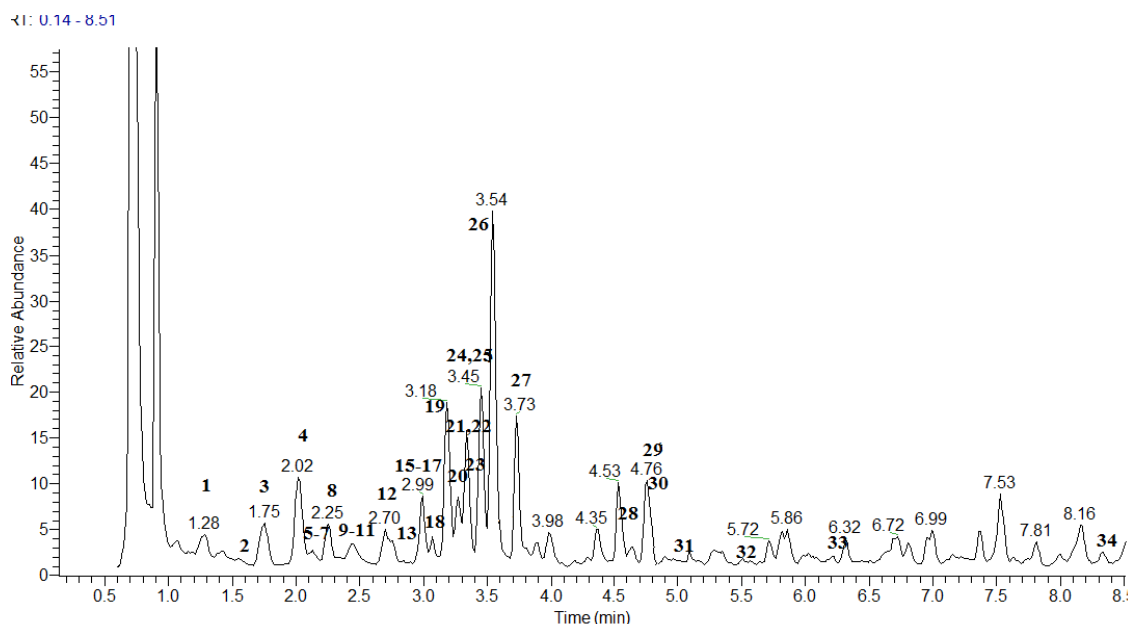

Figure S1. Extracted ion chromatograms of hydroxybenzoic and hydroxycinnamic acids and their derivatives (for numbers and fragmentation patterns, see Table S1).

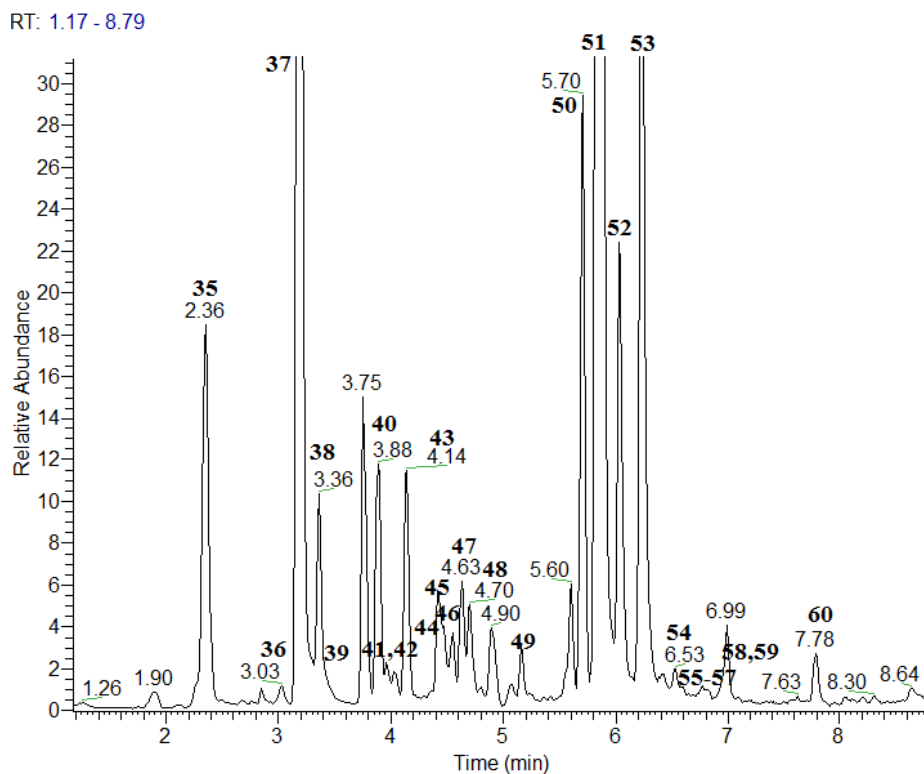

Figure S2. Extracted ion chromatograms of acylquinic acids (for numbers and fragmentation patterns, see Table S1).

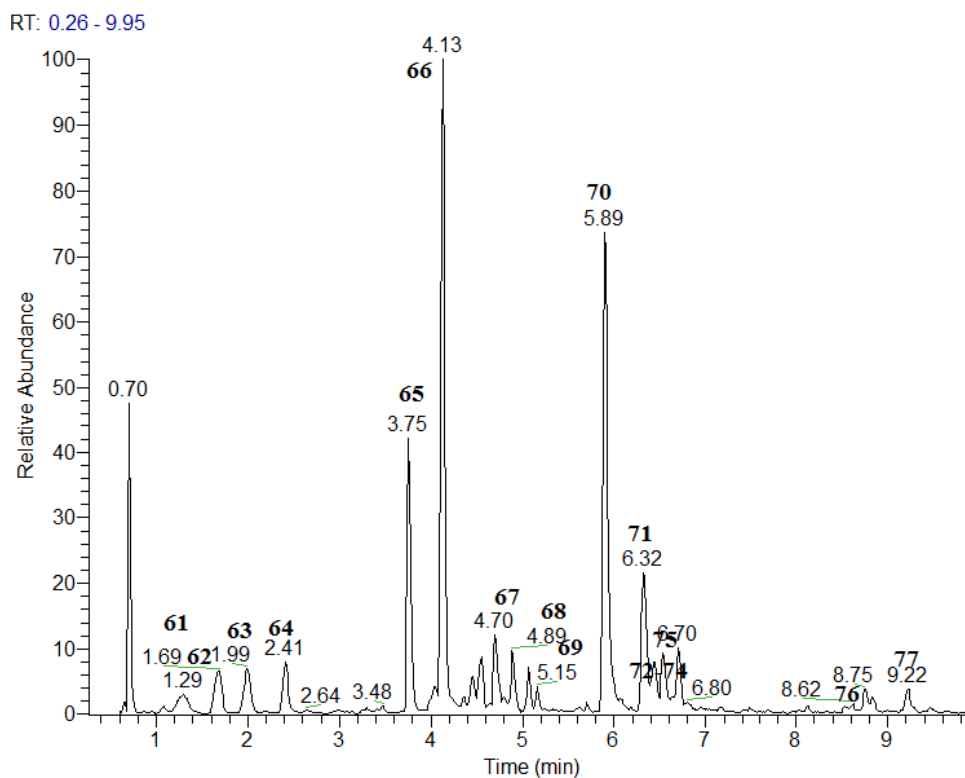

Figure S3. Extracted ion chromatograms of acylhexaric acids (for numbers and fragmentation patterns, see Table S1).

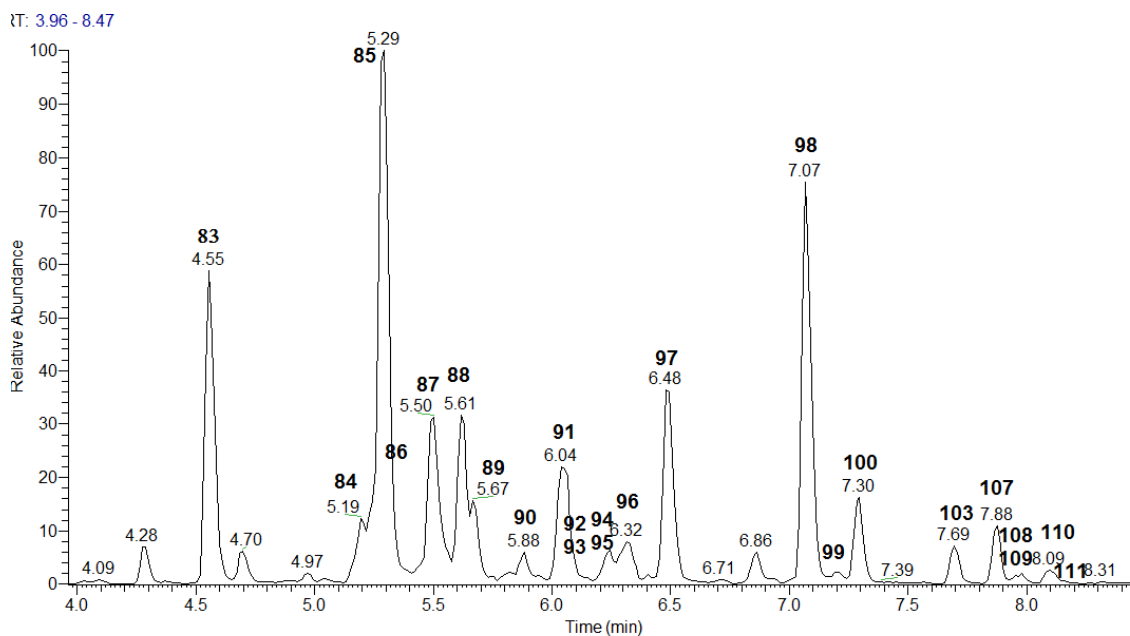

Figure S4. Extracted ion chromatograms of flavonoid glycosides (for numbers and fragmentation patterns, see Table S1).

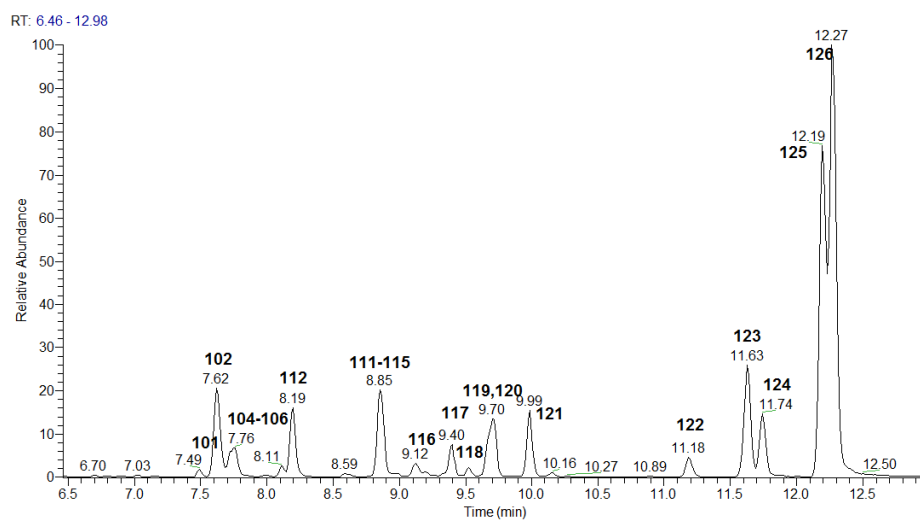

Figure S5. Extracted ion chromatograms of flavonoid aglycones (for numbers and fragmentation patterns, see Table S1).

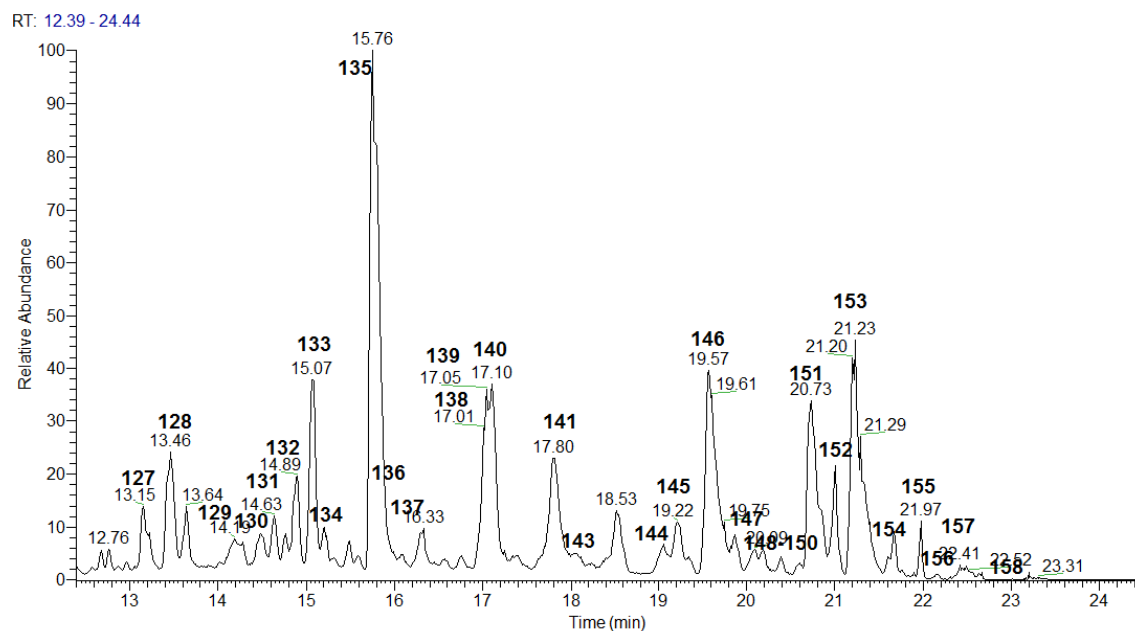

Figure S6. Extracted ion chromatograms of prenylated phloroglucinol  $\alpha$ -pyrones (for numbers and fragmentation patterns, see Table S1).

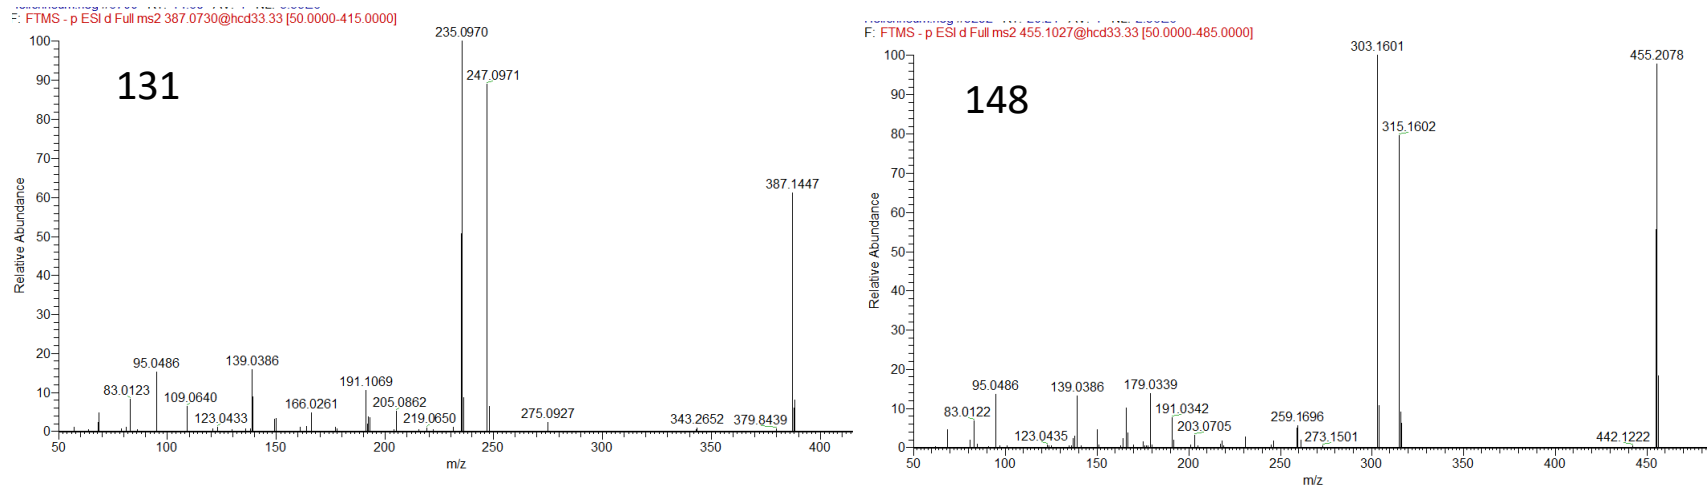

Figure S7. (-) ESI-MS/MS spectra of methylpyrones (MP) (For compound numbers and fragmentation patterns see Tab. S1).

F: FTMS - p ESI d Full ms2 401.0731@hcd33.33 [50.0000-430.0000]

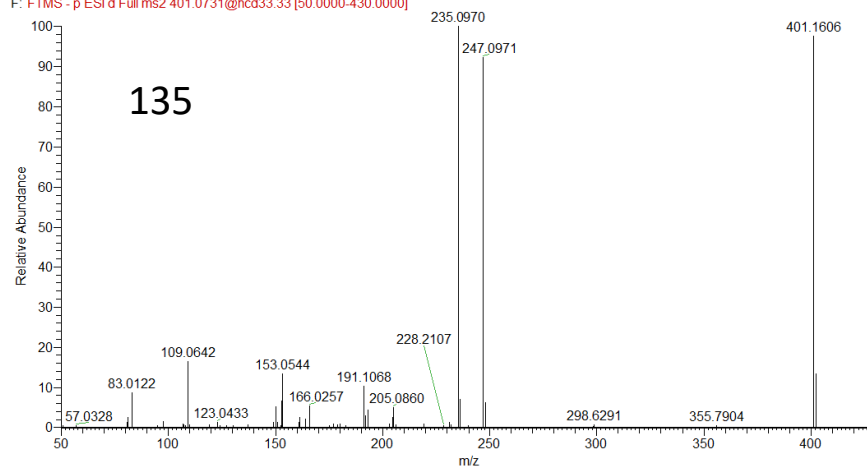

F: FTMS - p ESI d Full ms2 415.1981@hcd33.33 [50.0000-440.0000]

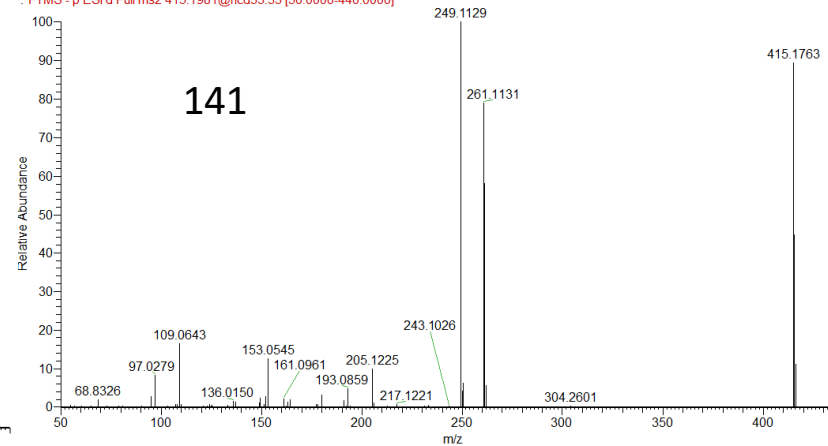

F: FTMS - p ESI d Full ms2 429.1044@hcd33.33 [50.0000-455.0000]

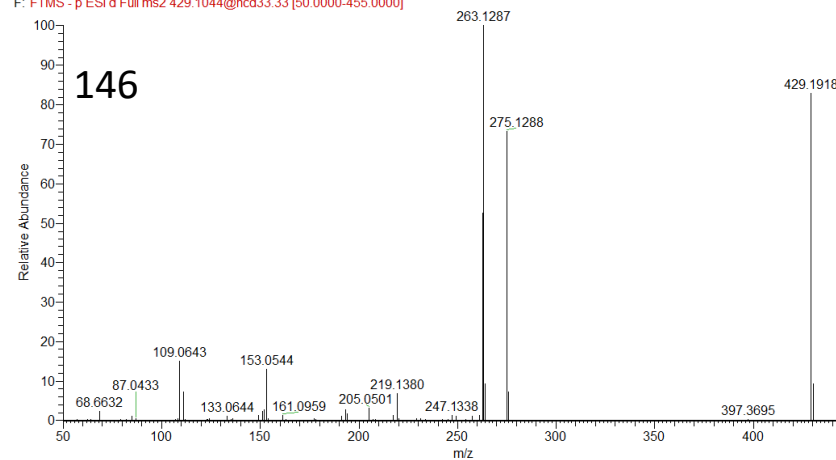

F: FTMS - p ESI d Full ms2 443.1568@hcd33.33 [50.0000-470.0000]

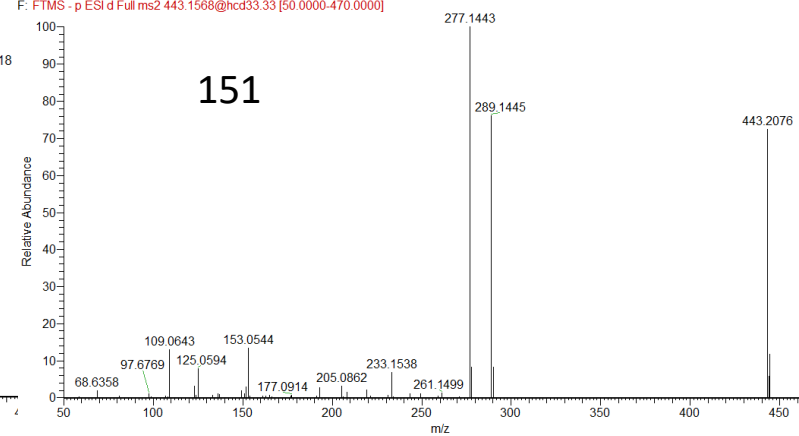

F: FTMS - p ESI d Full ms2 417.0684@hcd33.33 [50.0000-445.0000]

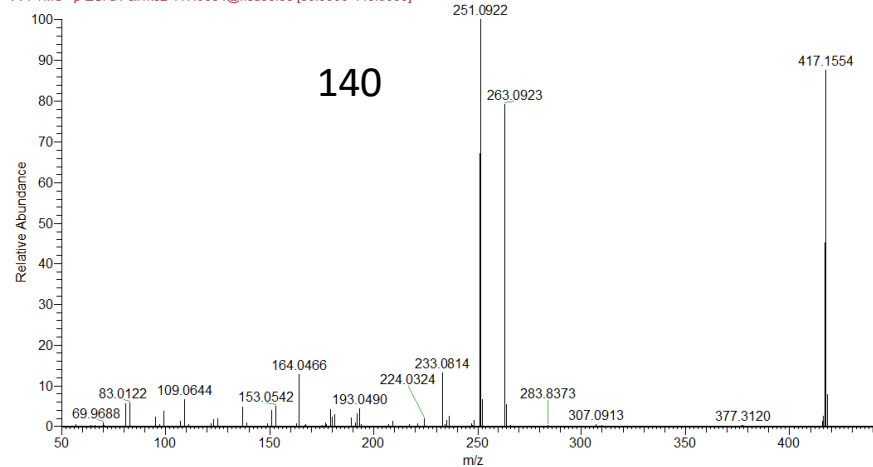

F: FTMS - p ESI d Full ms2 445.1150@hcd33.33 [50.0000-475.0000]

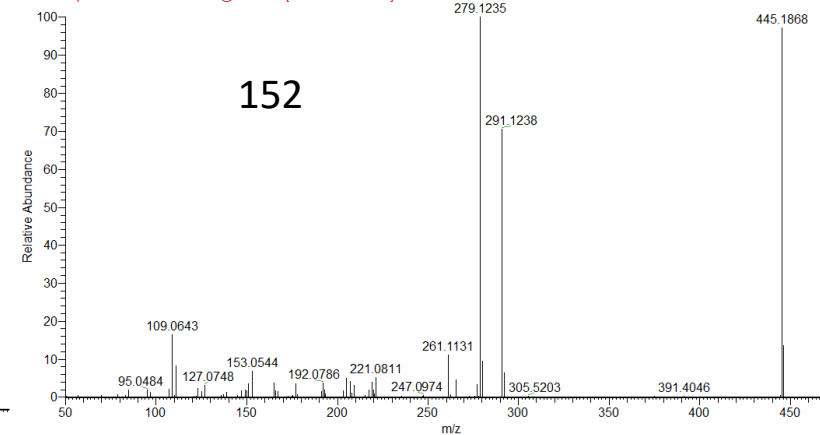

F: FTMS - p ESI d Full ms2 459.1306@hcd33.33 [50.0000-485.0000]

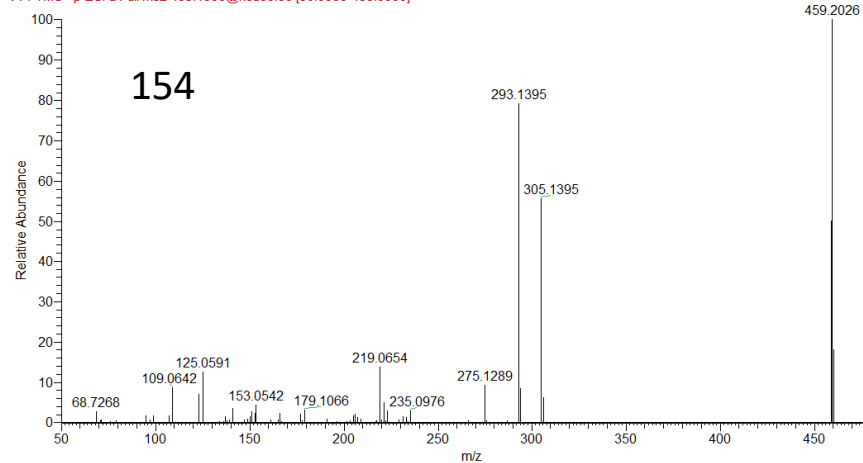

FTMS - p ESI d Full ms2 433.1145@hcd33.33 [50.0000-460.0000]

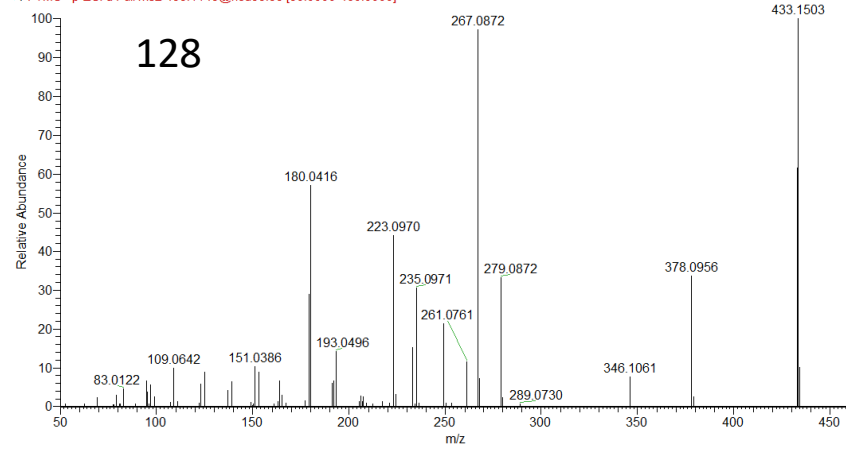

FTMS - p ESI d Full ms2 447.0939@hcd33.33 [50.0000-475.0000]

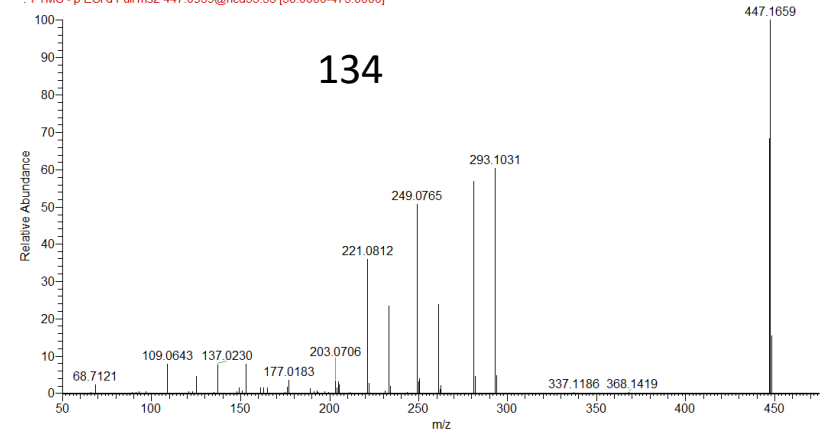

FTMS - p ESI d Full ms2 447.0939@hcd33.33 [50.0000-475.0000]

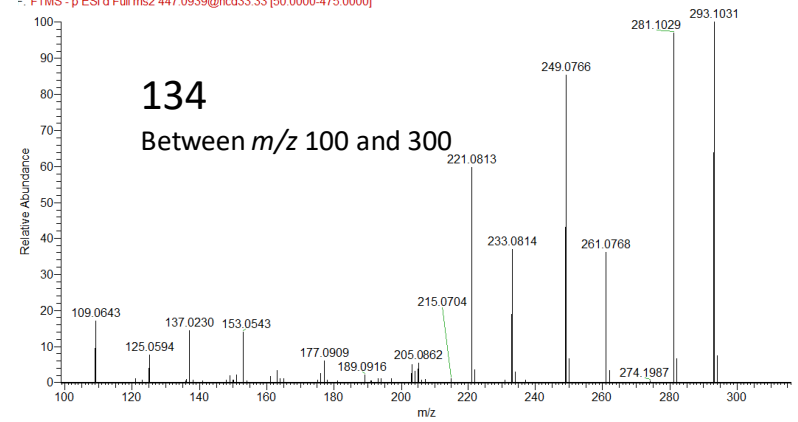

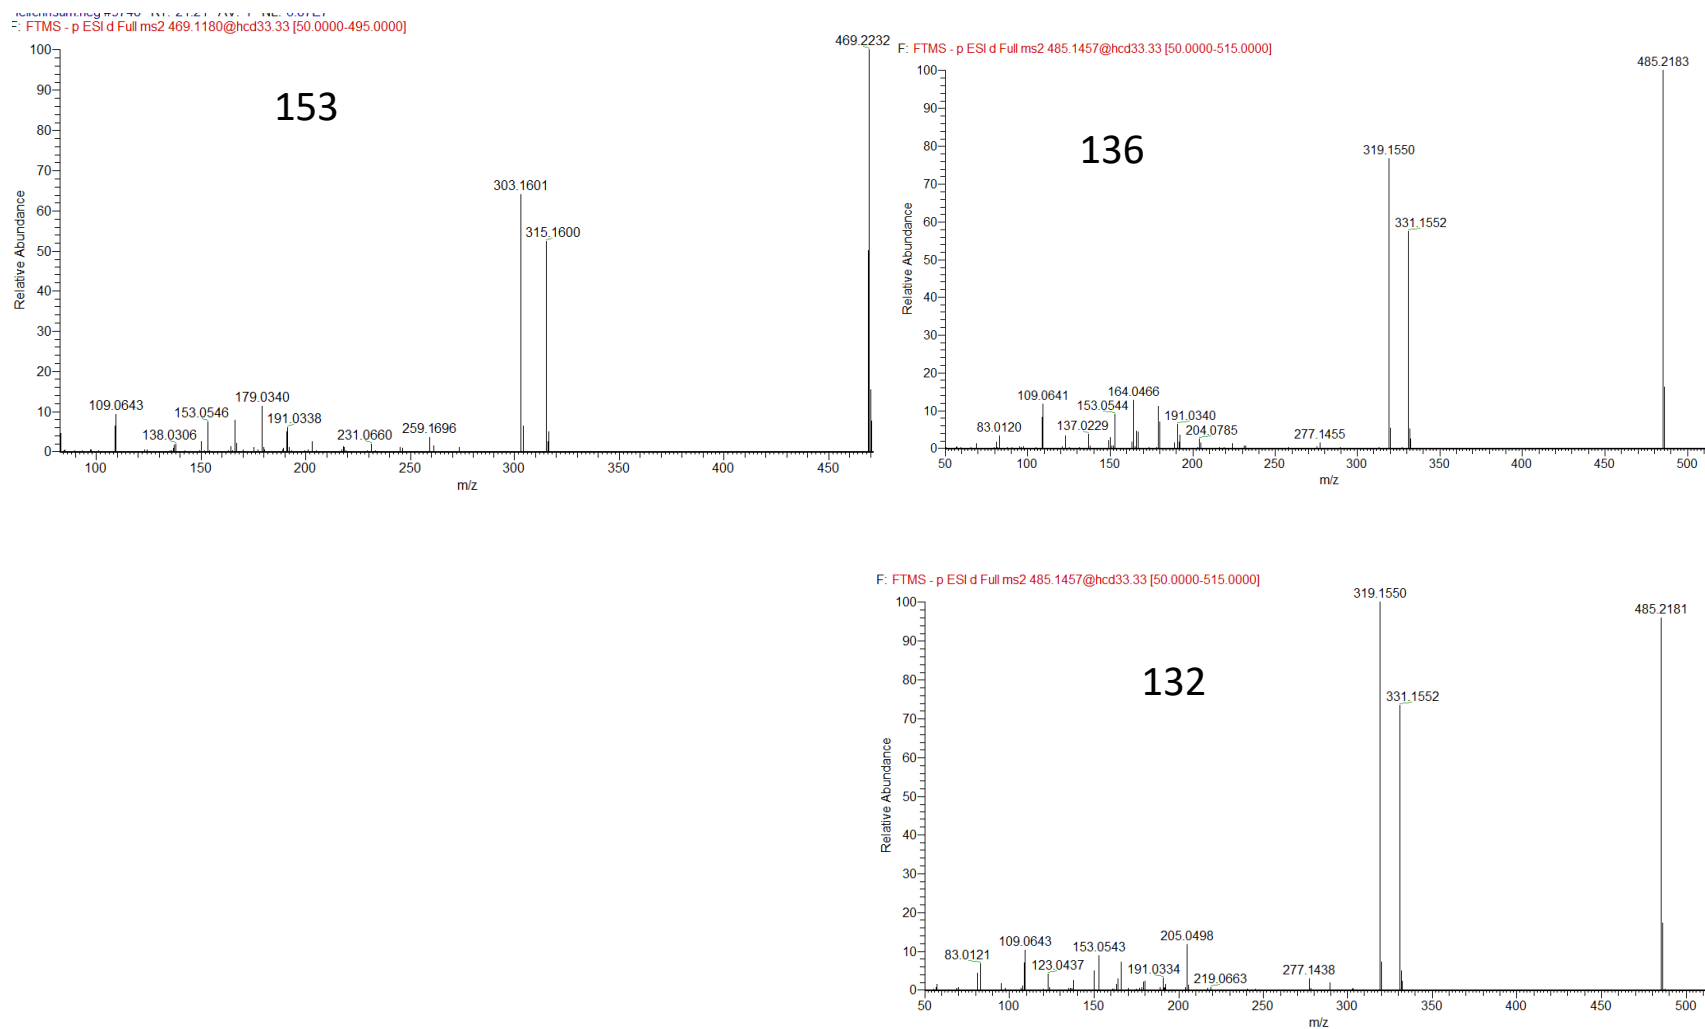

Figure S8. (-) ESI-MS/MS spectra of ethylpyrones (EP) (continue) (For compound numbers and fragmentation patterns see Tab. S1).



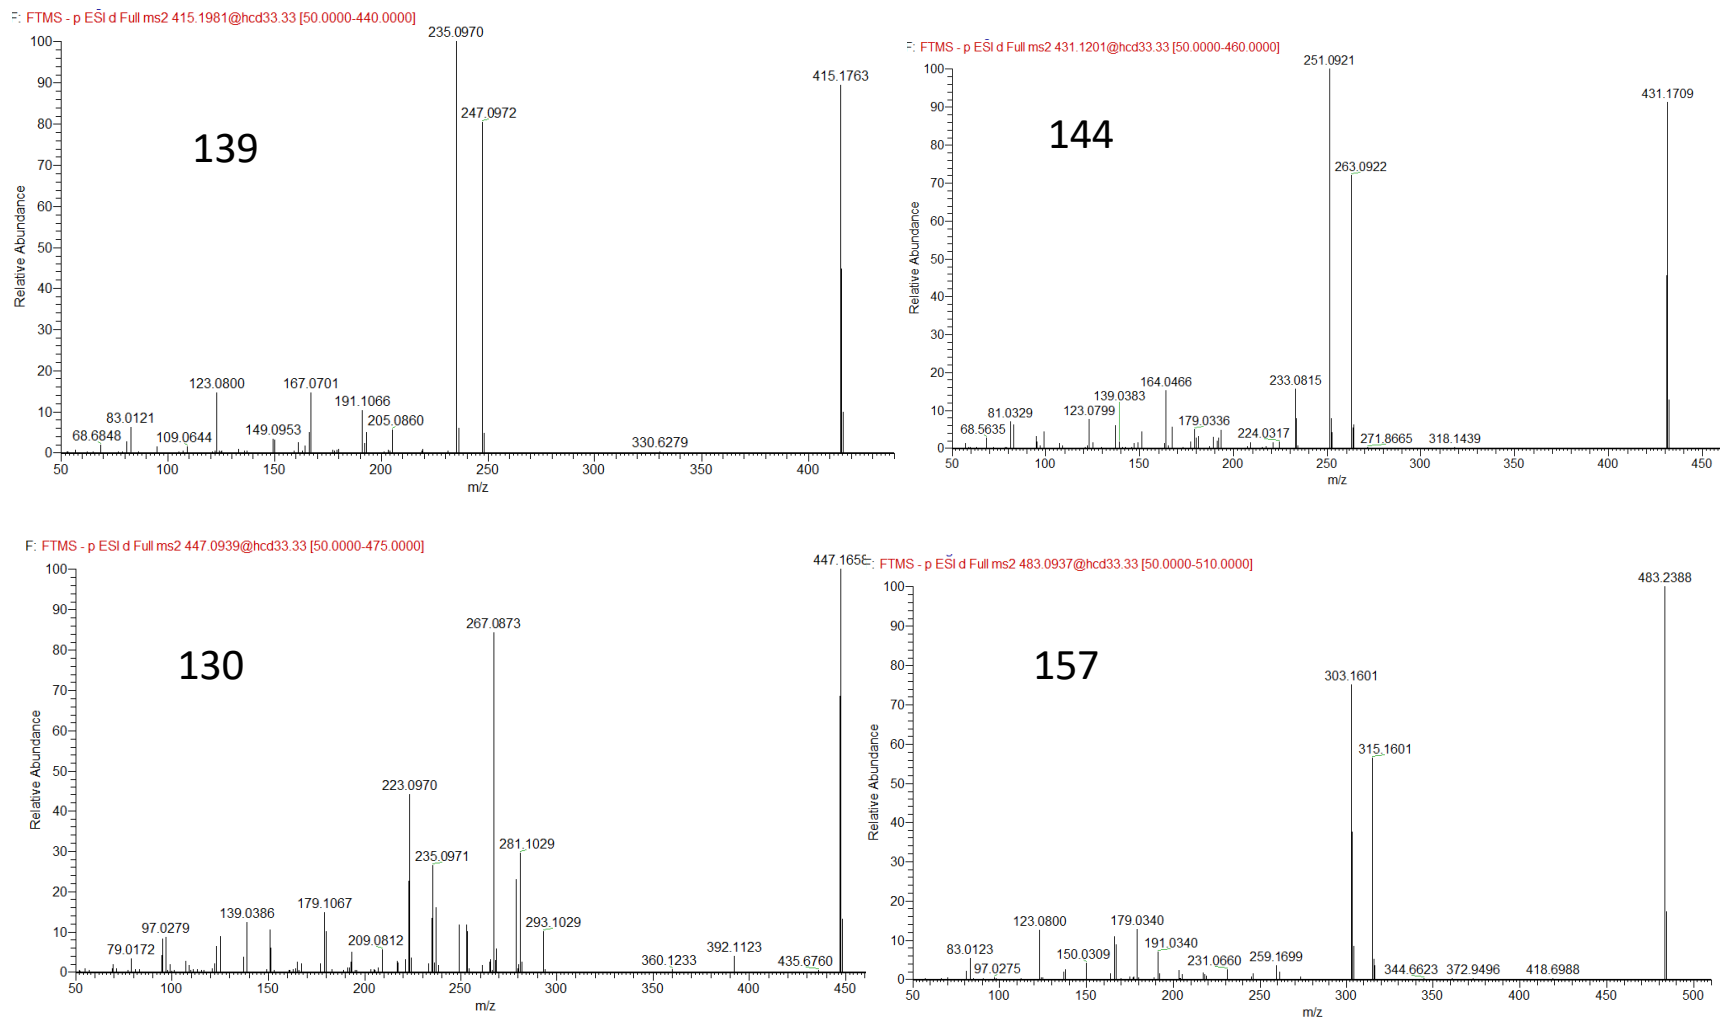

Figure S9. (-) ESI-MS/MS spectra of isopropylpyrones (IPP) (For compound numbers and fragmentation patterns see Tab. S1).

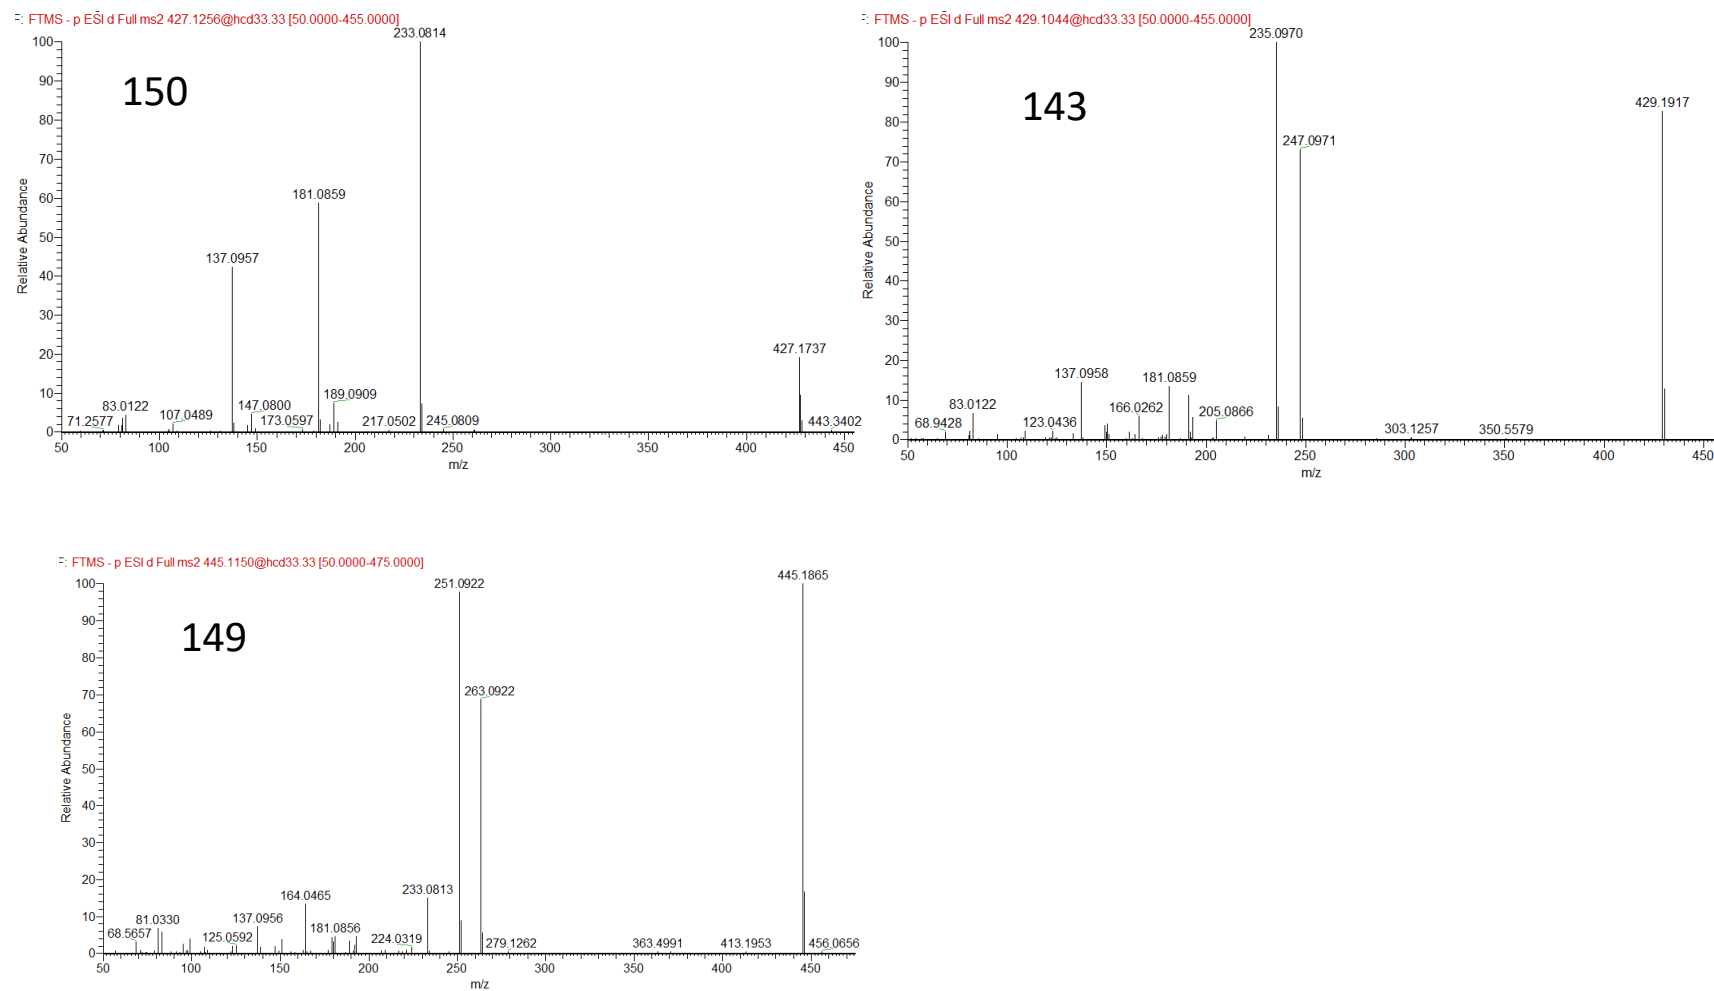

Figure S10. (-) ESI-MS/MS spectra of 1-methyl-propylpyrones (MPP) (For compound numbers and fragmentation patterns see Tab. S1).

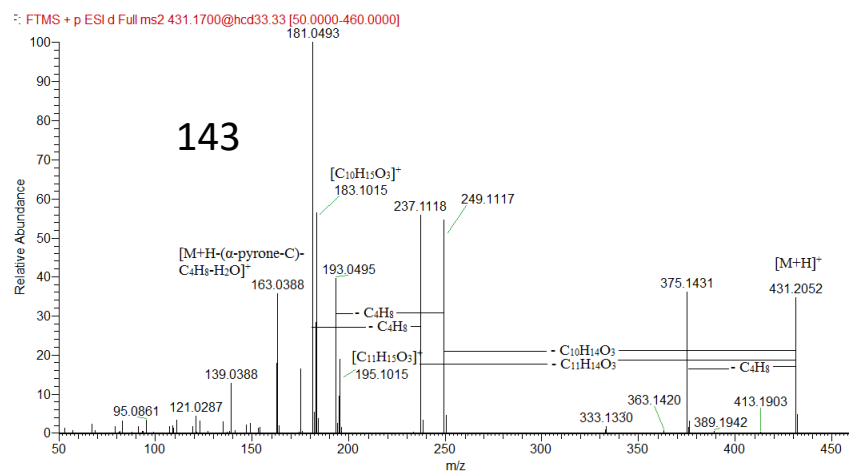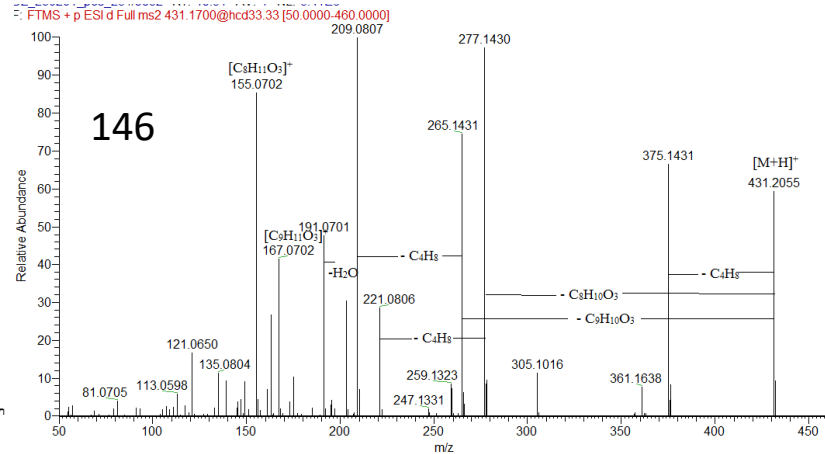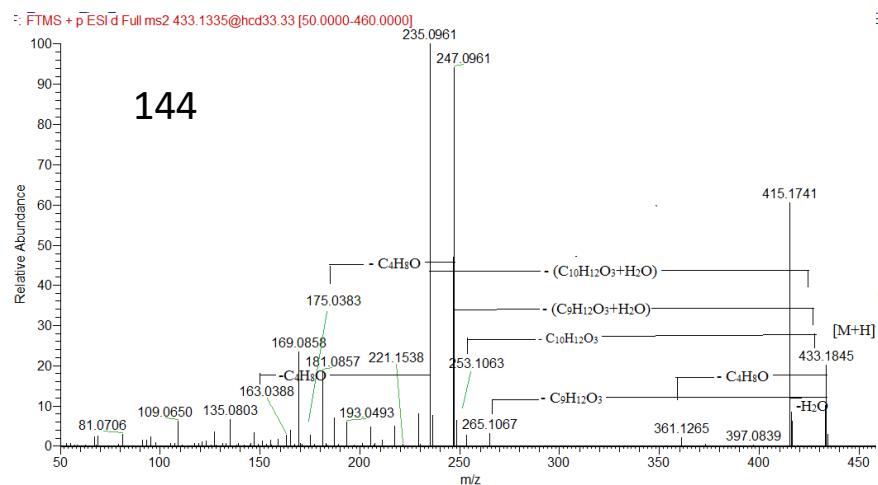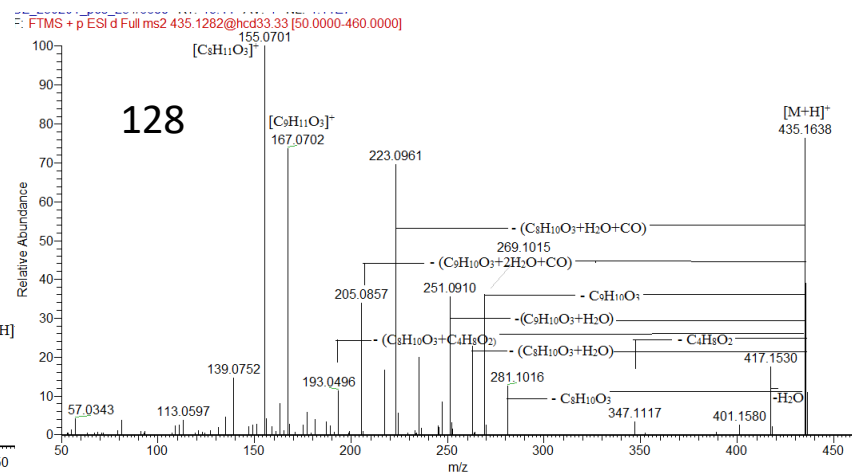

Figure S11. (+) ESI-MS/MS spectra of compounds **143**, **144**, **146** and **128**.

Table S1. Secondary metabolites in *Helichrysum italicum* methanol-aqueous extract.

| N <sup>o</sup>                                                | Identified/tentatively annotated compound                          | Molecular formula                               | Exact mass [M-H] <sup>-</sup> | Fragmentation pattern in (-) ESI-MS/MS                                                                                                                                                                                          | t <sub>R</sub> (min) | Δ ppm   | Level of confidence | References |
|---------------------------------------------------------------|--------------------------------------------------------------------|-------------------------------------------------|-------------------------------|---------------------------------------------------------------------------------------------------------------------------------------------------------------------------------------------------------------------------------|----------------------|---------|---------------------|------------|
| Hydroxybenzoic, hydroxycinnamic and phenylethanoid glycosides |                                                                    |                                                 |                               |                                                                                                                                                                                                                                 |                      |         |                     |            |
| 1.                                                            | hydroxybenzoic acid- <i>O</i> -hexoside                            | C <sub>13</sub> H <sub>16</sub> O <sub>8</sub>  | 299.0778                      | 299.0763 (0.2), 137.0229 (100), 93.0329 (65.8),                                                                                                                                                                                 | 1.28                 | -3.279  | 2                   | [1]        |
| 2.                                                            | protocatechuic acid- <i>O</i> -hexoside                            | C <sub>13</sub> H <sub>16</sub> O <sub>9</sub>  | 315.0727                      | 315.0723 (100), 153.0181 (28.2), 152.0101 (60.2), 123.0073 (2.7), 109.0286 (11.7), 108.0201 (88.5)                                                                                                                              | 1.68                 | 0.115   | 2                   | [1]        |
| 3.                                                            | vanillic acid- <i>O</i> -hexoside                                  | C <sub>14</sub> H <sub>18</sub> O <sub>9</sub>  | 329.0875                      | 329.0868 (1.8), 167.0337 (100), 152.0102 (22.9), 123.0437 (13.8), 108.0201 (35.6)                                                                                                                                               | 1.75                 | -0.198  | 2                   | [1]        |
| 4.                                                            | protocatechuic acid <sup>a</sup>                                   | C <sub>7</sub> H <sub>6</sub> O <sub>4</sub>    | 153.0181                      | 153.0179 (15.2), 109.0279 (100), 91.0173 (0.9), 81.0328 (1.2)                                                                                                                                                                   | 2.02                 | -1.392  | 1                   | [2]        |
| 5.                                                            | hydroxybenzoyl hexose <sup>b</sup>                                 | C <sub>13</sub> H <sub>16</sub> O <sub>8</sub>  | 299.0778                      | 299.0772 (91.8), 239.0556 (21.0), 209.0450 (6.2), 179.0330 (46.3), 137.0230 (100), 93.0330 (20.2)                                                                                                                               | 2.04                 | 0.002   | 2                   |            |
| 6.                                                            | protocatechuic acid- <i>O</i> -hexoside isomer                     | C <sub>13</sub> H <sub>16</sub> O <sub>9</sub>  | 315.0727                      | 315.0723 (48.1), 153.0543 (28.7), 123.0436 (54.7), 109.0279 (35.2)                                                                                                                                                              | 2.11                 | 1.729   | 2                   |            |
| 7.                                                            | <i>p</i> -hydroxyphenylacetic acid <i>O</i> -hexoside <sup>b</sup> | C <sub>14</sub> H <sub>18</sub> O <sub>8</sub>  | 313.0932                      | 313.0932 (100), 151.0387 (24.2), 123.0439 (7.7), 107.0488 (19.2)                                                                                                                                                                | 2.12                 | 0.988   | 2                   |            |
| 8.                                                            | syringic acid- <i>O</i> -hexoside <sup>b</sup>                     | C <sub>15</sub> H <sub>20</sub> O <sub>10</sub> | 359.0985                      | 359.0994 (8.4), 197.0446 (100), 182.0209 (19.9), 153.0544 (15.21), 138.0308 (26.4), 123.0072 (39.99)                                                                                                                            | 2.24                 | 0.036   | 2                   |            |
| 9.                                                            | caffeic acid- <i>O</i> -hexoside                                   | C <sub>15</sub> H <sub>18</sub> O <sub>9</sub>  | 341.0871                      | 341.0871 (21.8), 281.0674 (4.5), 251.0553 (2.7), 221.0447 (3.3), 179.0339 (100), 161.0232 (39.0), 135.0437 (59.8)                                                                                                               | 2.41                 | -1.980  | 2                   |            |
| 10.                                                           | hydroxybenzoic acid- <i>O</i> -hexoside isomer                     | C <sub>13</sub> H <sub>16</sub> O <sub>8</sub>  | 299.0778                      | 299.0770 (13.0), 137.0229 (100), 93.0331 (0.1)                                                                                                                                                                                  | 2.44                 | 0.800   | 2                   |            |
| 11.                                                           | vanillyl <i>O</i> -hexose <sup>b</sup>                             | C <sub>14</sub> H <sub>18</sub> O <sub>9</sub>  | 329.0875                      | 329.0878 (100), 269.0669 (6.9), 239.0563 (3.4), 209.0448 (31.0), 167.0337 (53.2), 152.0099 (4.5), 123.0435 (8.0), 108.0200 (2.7)                                                                                                | 2.47                 | 0.075   | 2                   |            |
| 12.                                                           | esculetin- <i>O</i> -hexoside <sup>b</sup>                         | C <sub>15</sub> H <sub>15</sub> O <sub>9</sub>  | 339.0724                      | 339.0720 (2.7), 177.0181 (100), 149.0230 (1.1), 133.0279 (9.0), 105.0330 (3.8), 89.0381 (2.2), 359.0983 (100), 269.0674 (1.7), 239.0556 (20.3), 197.0446 (36.7), 182.0209 (3.5), 153.0539 (1.8), 138.0307 (0.7), 123.0074 (2.3) | 2.70                 | 0.515   | 2                   |            |
| 13.                                                           | syringyl- <i>O</i> -hexose <sup>b</sup>                            | C <sub>15</sub> H <sub>20</sub> O <sub>10</sub> | 359.0984                      | 197.0446 (36.7), 182.0209 (3.5), 153.0539 (1.8), 138.0307 (0.7), 123.0074 (2.3)                                                                                                                                                 | 2.75                 | -0.278  | 2                   |            |
| 14.                                                           | 4-hydroxybenzoic acid <sup>a</sup>                                 | C <sub>7</sub> H <sub>6</sub> O <sub>3</sub>    | 137.0230                      | 137.0229 (100), 119.0124 (2.2), 108.0200 (9.1), 93.0330 (3.0), 65.0379 (1.2)                                                                                                                                                    | 2.83                 | -10.928 | 2                   | [1, 2]     |
| 15.                                                           | gentisic acid <sup>a</sup>                                         | C <sub>7</sub> H <sub>6</sub> O <sub>4</sub>    | 153.0181                      | 153.0179 (51.7), 125.0227 (1.2), 123.0072 (23.6), 109.0282 (35.2), 108.0200 (100), 81.0329 (5.7)                                                                                                                                | 2.98                 | -8.051  | 1                   |            |

|     |                                                                           |                                                 |          |                                                                                                               |      |         |   |        |
|-----|---------------------------------------------------------------------------|-------------------------------------------------|----------|---------------------------------------------------------------------------------------------------------------|------|---------|---|--------|
| 16. | <i>p</i> -hydroxyphenylacetic acid <i>O</i> -hexoside isomer <sup>b</sup> | C <sub>14</sub> H <sub>18</sub> O <sub>8</sub>  | 313.0929 | 313.0929 (15.2), 151.0386 (100), 123.0071(0.5), 109.0279 (3.8)                                                | 2.99 | 0.030   | 2 |        |
| 17. | hydroxybenzoic acid- <i>O</i> -hexoside                                   | C <sub>13</sub> H <sub>16</sub> O <sub>8</sub>  | 299.0778 | 299.0770 (13.0), 137.0229 (100), 108.0200 (0.8), 93.0331 (0.1)                                                | 2.99 | -0.704  | 2 | [1]    |
| 18. | caffeic acid <i>O</i> -hexoside                                           | C <sub>15</sub> H <sub>18</sub> O <sub>9</sub>  | 341.0871 | 341.0875 (8.4), 179.0337 (100), 135.0436 (68.9), 107.0486 (0.8)                                               | 3.07 | -0.602  | 2 |        |
| 19. | quinic acid                                                               | C <sub>7</sub> H <sub>12</sub> O <sub>6</sub>   | 191.0549 | 191.0550 (100), 173.0443 (1.9), 155.0336 (0.2), 127.0385 (4.0), 111.0435 (1.9), 93.0330 (6.0), 85.0279 (17.3) | 3.18 | -5.817  | 2 | [2]    |
| 20. | caffeic acid- <i>O</i> -hexoside                                          | C <sub>15</sub> H <sub>18</sub> O <sub>9</sub>  | 341.0871 | 341.0875 (8.4), 179.0337 (100), 135.0436 (68.9), 107.0486 (0.8)                                               | 3.27 | -0.386  | 2 | [1]    |
| 21. | coumaric acid- <i>O</i> -hexoside                                         | C <sub>15</sub> H <sub>18</sub> O <sub>8</sub>  | 325.0930 | 325.0918 (1.3), 163.0387 (100), 1445.0281 (4.1), 119.0487 (87.7)                                              | 3.34 | -3.355  | 2 | [1, 2] |
| 22. | <i>p</i> -coumaric acid <sup>a</sup>                                      | C <sub>9</sub> H <sub>8</sub> O <sub>3</sub>    | 163.0389 | 163.0387 (6.2), 145.0125 (0.3), 135.0436 (0.4), 119.0486 (100)                                                | 3.35 | -8.203  | 1 | [2]    |
| 23. | vanillic acid <i>O</i> -hexoside isomer                                   | C <sub>14</sub> H <sub>18</sub> O <sub>9</sub>  | 329.0875 | 329.0873 (2.5), 167.0337 (100), 151.0019 (1.5), 123.0436 (21.8), 107.0120 (0.8)                               | 3.37 | 0.252   | 2 | [1]    |
| 24. | esculetin                                                                 | C <sub>9</sub> H <sub>6</sub> O <sub>4</sub>    | 177.0193 | 177.0181 (100), 149.0230 (2.9), 133.0280 (19.9), 105.0329 (11.0), 89.0380 (8.4)                               | 3.46 | 4.982   | 2 | [1]    |
| 25. | <i>p</i> -hydroxyphenylacetic acid <sup>a,b</sup>                         | C <sub>8</sub> H <sub>8</sub> O <sub>3</sub>    | 151.0401 | 151.0387 (100), 109.0279 (14.4), 124.0150 (4.1)                                                               | 3.46 | -9.252  | 2 |        |
| 26. | caffeic acid <sup>a</sup>                                                 | C <sub>9</sub> H <sub>8</sub> O <sub>4</sub>    | 179.0339 | 179.0339 (18.3), 135.0437 (100), 117.0332 (0.5), 107.0487 (1.2)                                               | 3.54 | -6.044  | 1 | [2]    |
| 27. | dehydrochorismic acid <sup>b</sup>                                        | C <sub>10</sub> H <sub>8</sub> O <sub>6</sub>   | 223.0248 | 223.0232 (1.3), 179.0338 (67.0), 153.0180 (23.5), 135.0437 (36.7), 109.0279 (100)                             | 3.73 | -7.180  | 2 |        |
| 28. | <i>m</i> -coumaric acid <sup>a,b</sup>                                    | C <sub>9</sub> H <sub>8</sub> O <sub>3</sub>    | 163.0389 | 163.0388 (7.6), 119.0487 (100)                                                                                | 4.56 | -7.958  | 1 |        |
| 29. | syringic acid <sup>a</sup>                                                | C <sub>9</sub> H <sub>10</sub> O <sub>5</sub>   | 197.0446 | 197.0446 (45.5), 179.0339 (1.1), 167.0334 (0.4), 153.0543 (100)                                               | 4.76 | -4.703  | 1 | [2]    |
| 30. | vanillic acid <sup>a,b</sup>                                              | C <sub>8</sub> H <sub>8</sub> O <sub>4</sub>    | 167.0338 | 167.0337 (100), 152.0102 (24.6), 123.0436 (3.9), 95.0121 (3.3)                                                | 4.78 | -7.615  | 1 |        |
| 31. | <i>o</i> -coumaric acid <sup>a,b</sup>                                    | C <sub>9</sub> H <sub>8</sub> O <sub>3</sub>    | 163.0389 | 163.0388 (8.0), 135.0438 (0.6), 119.0487 (100)                                                                | 5.01 | -7.958  | 1 |        |
| 32. | scopoletin                                                                | C <sub>10</sub> H <sub>8</sub> O <sub>4</sub>   | 191.0350 | 191.0340 (22.4), 176.0103 (100), 148.0151 (15.4), 120.0200 (1.2), 104.0251 (19.0)                             | 5.06 | -5.088  | 2 | [1]    |
| 33. | caffeic acid <i>O</i> -(hydroxyisovaleryl)-hexoside <sup>b</sup>          | C <sub>20</sub> H <sub>26</sub> O <sub>11</sub> | 441.1402 | 441.1402 (23.2), 323.0782 (0.8), 179.0338 (100), 135.0437 (68.1), 107.0487 (0.6),                             | 5.58 | 0.125   | 2 |        |
| 34. | salicylic acid <sup>a</sup>                                               | C <sub>7</sub> H <sub>6</sub> O <sub>3</sub>    | 137.0230 | 137.0230 (33.1), 108.0201 (3.3), 93.0330 (100)                                                                | 6.27 | -10.344 | 1 | [2]    |

|                                               |                                                               |                                                 |          |                                                                                                                                                                                                       |      |        |   |        |
|-----------------------------------------------|---------------------------------------------------------------|-------------------------------------------------|----------|-------------------------------------------------------------------------------------------------------------------------------------------------------------------------------------------------------|------|--------|---|--------|
| 35.                                           | caffeic acid <i>O</i> -(hydroxybenzoyl)-hexoside <sup>b</sup> | C <sub>22</sub> H <sub>22</sub> O <sub>11</sub> | 461.1089 | 461.1090 (21.7), 323.0780 (4.9), 179.0339 (97.0), 137.0229 (100), 135.0437 (85.5), 93.0330 (38.0)                                                                                                     | 8.26 | 0.142  | 1 |        |
| <b>Mono-, diacyl- and triacylquinic acids</b> |                                                               |                                                 |          |                                                                                                                                                                                                       |      |        |   |        |
| 36.                                           | neochlorogenic (3-caffeoylquinic) acid <sup>a,b</sup>         | C <sub>16</sub> H <sub>18</sub> O <sub>9</sub>  | 353.0867 | 353.0880 (40.4), 191.0551 (100), 179.0339 (65.2), 173.0442 (3.3), 161.0231 (3.8), 135.0437 (45.3), 111.0433 (2.0), 93.0330 (4.1), 85.0279 (7.5)                                                       | 2.35 | 0.495  | 1 |        |
| 37.                                           | 3- <i>p</i> -coumaroylquinic acid                             | C <sub>16</sub> H <sub>18</sub> O <sub>8</sub>  | 337.0928 | 337.0933(14.3), 191.0551 (28.7), 173.0441 (5.5), 163.0387 (100), 135.0435 (1.3), 119.0486 (30.3), 111.0432(1.5), 93.0329 (2.6), 85.0278 (3.0)                                                         | 3.02 | 1.096  | 2 |        |
| 38.                                           | chlorogenic (5-caffeoylquinic) acid <sup>a</sup>              | C <sub>16</sub> H <sub>18</sub> O <sub>9</sub>  | 353.0874 | 353.0880 (4.8), 191.0550 (100), 179.0335 (1.0), 161.0231 (1.6), 127.0384 (1.8), 111.0436 (9.7), 93.0329 (2.6), 85.0278 (6.5)                                                                          | 3.18 | 0.665  | 1 | [1, 2] |
| 39.                                           | 4-caffeoylquinic acid                                         | C <sub>16</sub> H <sub>18</sub> O <sub>9</sub>  | 353.0878 | 353.0880 (32.0), 191.0551 (60.6), 179.0339 (70.9), 173.0445 (100), 155.0337 (4.8), 135.0437 (51.7), 111.0436 (2.8), 93.0330 (20.6), 85.0278 (9.0)                                                     | 3.35 | -0.100 | 2 | [1]    |
| 40.                                           | 3-feruloylquinic acid                                         | C <sub>17</sub> H <sub>20</sub> O <sub>9</sub>  | 367.1034 | 367.1035 (20.8), 193.0496 (100), 149.0594 (2.8), 134.0358 (53.2), 127.0388 (0.6), 111.0438 (1.0), 93.0329 (1.7)                                                                                       | 3.43 | ..     | 2 | [2]    |
| 41.                                           | 5-caffeoylquinic acid isomer                                  | C <sub>16</sub> H <sub>18</sub> O <sub>9</sub>  | 353.0874 | 353.0880(6.4), 191.0550 (100), 179.0341 (0.9), 173.0446 (0.9), 161.0233 (2.1), 127.0383 (1.7), 93.0330 (2.6), 85.0279 (8.2)                                                                           | 3.88 | 0.580  | 2 | [1]    |
| 42.                                           | 5- <i>p</i> -coumaroylquinic acid                             | C <sub>16</sub> H <sub>18</sub> O <sub>8</sub>  | 337.0928 | 337.0932 (7.8), 191.0550 (100), 173.0442 (6.6), 163.0389 (5.9), 145.0281 (1.5), 119.0487 (5.2), 93.0328 (18.5), 85.0277 (4.4)                                                                         | 3.96 | 0.829  | 2 | [1]    |
| 43.                                           | 3-caffeoyl-5-hydroxy-dihydrocaffeoylquinic acid <sup>b</sup>  | C <sub>25</sub> H <sub>26</sub> O <sub>13</sub> | 533.1288 | 533.1302 (68.2), 371.0992 (2.7), 353.0874 (17.8), 335.0778 (4.0), 191.0551 (100), 179.0338 (42.9), 173.0444 (14.4), 161.0233 (7.3), 135.0437 (54.8), 111.0435 (2.0), 93.0329 (8.0), 85.0279 (9.3)     | 4.03 | 0.236  | 2 |        |
| 44.                                           | 1, 3- dicaffeoylquinic acid <sup>b</sup>                      | C <sub>25</sub> H <sub>24</sub> O <sub>12</sub> | 515.1190 | 515.1196 (82.0), 353.0879 (38.9), 335.0772 (12.2), 191.0550 (100), 179.0338 (69.5), 161.0230 (7.7), 135.0436 (61.4), 111.0438 (3.5), 93.0328 (5.3)85.0278 (7.2)                                       | 4.14 | 0.137  | 2 |        |
| 45.                                           | 3-caffeoyl-4- hydroxy-dihydrocaffeoylquinic acid <sup>b</sup> | C <sub>25</sub> H <sub>26</sub> O <sub>13</sub> | 533.1288 | 533.1312 (100), 371.0615 (13.7), 353.0875 (6.7), 335.0773 (11.2), 191.0551 (10.4), 179.0339 (21.9), 173.0444 (92.0), 161.0231 (16.1), 135.0437 (71.5), 127.0385 (2.0), 111.0437 (1.5), 93.0330 (19.0) | 4.37 | 2.1    | 2 |        |
| 46.                                           | 5-feruloylquinic acid                                         | C <sub>17</sub> H <sub>20</sub> O <sub>9</sub>  | 367.1034 | 367.1035 (16.7), 193.0497 (5.7), 191.0551 (100), 173.0444 (12.0), 155.0338 (0.4), 134.0359 (10.1), 111.0437 (3.5), 93.0329 (25.2), 85.0278 (5.1)                                                      | 4.42 | -0.096 | 2 | [1]    |

|     |                                                              |                                                 |          |                                                                                                                                                                                                                                                                                                        |      |        |   |        |
|-----|--------------------------------------------------------------|-------------------------------------------------|----------|--------------------------------------------------------------------------------------------------------------------------------------------------------------------------------------------------------------------------------------------------------------------------------------------------------|------|--------|---|--------|
| 47. | 1-caffeoyl-3-hydroxy-dihydrocaffeoylquinic acid <sup>b</sup> | C <sub>25</sub> H <sub>26</sub> O <sub>13</sub> | 533.1288 | 533.1368 (17.8), 371.0991 (26.6), 353.0878 (5.6), 335.0771 (2.9), 191.0551 (26.1), 179.0338 (10.2), 173.0445 (12.5), 161.0235 (3.4), 135.0436 (100), 93.0330 (3.9), 85.0278 (23.7)                                                                                                                     | 4.45 | 12.710 | 2 |        |
| 48. | 5- <i>p</i> -coumaroylquinic acid isomer                     | C <sub>16</sub> H <sub>18</sub> O <sub>8</sub>  | 337.0928 | 337.0929 (7.4), 191.0550 (100), 173.0444 (1.9), 163.0388 (1.8), 127.0384 (1.5), 111.0435 (1.0), 93.0329 (4.7), 85.0277 (6.7)                                                                                                                                                                           | 4.63 | 0.028  | 2 | [1]    |
| 49. | 4-feruloylquinic acid <sup>b</sup>                           | C <sub>17</sub> H <sub>20</sub> O <sub>9</sub>  | 367.1034 | 367.1034 (95.0), 193.0496 (10.9), 191.0562 (1.7), 173.0444 (72.13), 163.0389 (2.2), 134.0359 (22.2), 111.0436 (14.9), 93.0329 (100)                                                                                                                                                                    | 4.69 | -0.260 | 2 |        |
| 50. | 1, 3-dicaffeoylquinic acid-hexoside                          | C <sub>31</sub> H <sub>34</sub> O <sub>17</sub> | 677.1723 | 677.1730 (81.2), 515.1407 (82.0), 353.0876 (17.2), 341.0877 (30.0), 323.0772 (19.9), 191.0551 (82.1), 179.0339 (98.9), 173.0441 (3.8), 161.0230 (29.6), 135.0437 (100), 93.0331 (7.1), 85.0279 (6.9)                                                                                                   | 5.15 | 0.956  | 2 | [1]    |
| 51. | 3,4-dicaffeoylquinic acid <sup>a</sup>                       | C <sub>25</sub> H <sub>24</sub> O <sub>12</sub> | 515.1190 | 515.1196 (100), 353.0877 (12.3), 335.0780 (5.0), 203.0334 (0.4), 191.0551 (24.9), 179.0339 (41.6), 173.0444 (46.7), 161.0232 (13.1), 135.0437 (44.2), 127.0386 (1.9), 111.0436 (3.4), 93.0329 (14.6), 85.0278 (3.1)                                                                                    | 5.71 | 0.254  | 1 | [1, 2] |
| 52. | 3,5-dicaffeoylquinic acid <sup>a</sup>                       | C <sub>25</sub> H <sub>24</sub> O <sub>12</sub> | 515.1189 | 515.1197 (19.6), 353.0879 (100), 335.0774 (1.5), 191.0551 (87.0), 179.0339 (38.8), 173.0445 (3.8), 161.0233 (4.7), 135.0437 (1.4), 111.0434 (1.5), 93.0330 (4.1), 85.0279 (7.5)                                                                                                                        | 5.85 | 0.370  | 1 | [1]    |
| 53. | 1,3-dicaffeoylquinic acid malonyl <sup>b</sup>               | C <sub>28</sub> H <sub>26</sub> O <sub>15</sub> | 601.1199 | 601.1207 (37.5), 557.1307 (16.1), 515.1199 (11.1), 439.0883 (26.8), 395.0983 (43.2), 233.0661 (100), 191.0551 (17.5), 179.0338 (14.1), 173.0443 (14.1), 161.0231 (11.1), 155.0334 (3.5), 135.0436 (15.6), 133.0280 (5.3), 127.0385 (1.4), 111.0435 (2.5), 93.0330 (6.3), 85.0278 (1.2), 59.0122 (91.9) | 5.95 | 1.292  | 2 |        |
| 54. | 1,5-dicaffeoylquinic acid <sup>a</sup>                       | C <sub>25</sub> H <sub>24</sub> O <sub>12</sub> | 515.1190 | 515.1197 (28.5), 353.0878 (83.6), 335.0764 (2.5), 191.0551 (100), 179.0339 (47.4), 173.0445 (7.1), 161.0231 (7.3), 155.0338 (1.4), 135.0437 (56.5), 127.0385 (3.4), 111.0434 (1.9), 93.0330 (5.7), 85.0279 (9.2)                                                                                       | 6.03 | -0.096 | 1 | [1]    |
| 55. | 3, 5-dicaffeoylquinic acid malonyl <sup>b</sup>              | C <sub>28</sub> H <sub>26</sub> O <sub>15</sub> | 601.1199 | 601.1199 (20.6), 557.1304 (13.8), 515.1189 (11.8), 439.0882 (9.9), 395.0982 (80.0), 353.0869 (0.5), 335.0772 (2.5), 233.0661 (100), 191.0551 (6.7), 179.0339 (5.4), 173.0443 (17.3), 161.0233 (8.5), 135.0436 (11.2), 133.0281 (3.4), 111.0435 (2.5), 93.0329 (5.6), 59.0122 (88.4)                    | 6.15 | -0.039 | 2 |        |

|     |                                                           |                                                 |          |                                                                                                                                                                                                                                                                                                          |      |        |   |     |
|-----|-----------------------------------------------------------|-------------------------------------------------|----------|----------------------------------------------------------------------------------------------------------------------------------------------------------------------------------------------------------------------------------------------------------------------------------------------------------|------|--------|---|-----|
| 56. | 4,5-dicaffeoylquinic acid                                 | C <sub>25</sub> H <sub>24</sub> O <sub>12</sub> | 515.1190 | 515.1196 (100), 353.0878 (64.2), 335.0765 (0.6), 229.0565 (0.6), 203.0345 (3.0), 191.0551 (34.0), 179.0338 (70.0), 173.0443 (85.5), 155.0336 (4.7), 135.0436 (51.0), 127.0383 (0.7), 111.0436 (3.0), 93.0329 (18.7), 85.0280 (3.2)                                                                       | 6.24 | 0.254  | 2 | [1] |
| 57. | 3, 4-dicaffeoylquinic acid malonyl <sup>b</sup>           | C <sub>28</sub> H <sub>26</sub> O <sub>15</sub> | 601.1199 | 601.1202 (20.6), 557.1302 (11.0), 515.1196 (4.5), 439.0883 (15.8), 395.0984 (46.1), 353.0877 (0.8), 233.0661 (100), 191.0551 (11.6), 179.0339 (7.4), 173.0443 (81.1), 161.0231 (6.4), 155.0336 (4.7), 135.0438 (13.7), 133.0280 (4.3), 111.0438 (4.6), 93.0328 (17.6), 59.0122 (27.4)                    | 6.32 | 0.577  | 2 |     |
| 58. | 4, 5-dicaffeoylquinic acid malonyl <sup>b</sup>           | C <sub>28</sub> H <sub>26</sub> O <sub>15</sub> | 601.1199 | 601.1203 (8.4), 557.1302 (10.0), 515.1190 (10.9), 439.0883 (25.5), 395.0981 (100), 353.0878 (16.1), 335.0777 (16.1), 233.0661 (81.7), 191.0551 (44.8), 179.0338 (25.9), 173.0443 (74.7), 161.0232 (11.2), 155.0337 (5.1), 135.0437 (39.1), 111.0435 (4.2), 93.0329 (16.9), 85.0279 (3.9), 59.0122 (29.0) | 6.51 | 0.677  | 2 |     |
| 59. | 3- <i>p</i> -coumaroyl-5-caffeoylquinic acid <sup>b</sup> | C <sub>25</sub> H <sub>24</sub> O <sub>11</sub> | 499.1251 | 499.1259 (28.4), 353.0869 (1.8), 337.0929 (81.4), 335.0773 (2.0), 191.0552 (21.9), 179.0341 (1.2), 173.0443 (8.6), 163.0387 (100), 135.0436 (3.5), 119.0487 (35.6), 93.0330 (4.4), 85.0276 (1.5)                                                                                                         | 6.53 | 2.535  | 2 |     |
| 60. | 3-feruloyl-5-caffeoylquinic acid                          | C <sub>26</sub> H <sub>26</sub> O <sub>12</sub> | 529.1356 | 529.1347 (12.6), 367.1034 (100), 353.0889 (1.4), 335.0789 (0.7), 193.0496 (92.8), 191.0551 (28.3), 179.0342 (2.2), 173.0443 (11.8), 161.0233 (3.9), 155.0336 (2.4), 134.0358 (62.5), 111.0433 (2.2), 93.0329 (0.7), 85.0278 (1.8)                                                                        | 6.83 | -0.849 | 2 | [1] |
| 61. | 3-caffeoyl-5-feruloylquinic acid <sup>b</sup>             | C <sub>26</sub> H <sub>26</sub> O <sub>12</sub> | 529.1356 | 529.1356 (47.0), 367.1034 (59.1), 353.0879 (44.1), 335.0770 (1.8), 193.0497 (42.5), 191.0551 (100), 179.0339 (34.3), 173.0444 (16.9), 161.0232 (8.0), 155.0334 (2.4), 135.0438 (36.1), 134.0358 (36.1), 111.0437 (3.4), 93.0329 (16.5), 85.0278 (7.2)                                                    | 6.90 | 0.776  | 2 |     |
| 62. | 4- <i>p</i> -coumaroyl-5-caffeoylquinic acid <sup>b</sup> | C <sub>25</sub> H <sub>24</sub> O <sub>11</sub> | 499.1252 | 499.1225 (26.5), 353.0879 (1.2), 337.0930 (63.0), 191.0549 (6.5), 173.0443 (100), 163.0388 (19.1), 135.0436 (4.4), 133.0278 (1.4), 127.0385 (1.4), 121.0279 (45.9), 119.0486 (11.2), 111.0435 (3.3), 93.0329 (24.5), 85.0279 (1.9)                                                                       | 6.94 | -4.117 | 2 |     |
| 63. | 4-feruloyl-5-caffeoylquinic acid                          | C <sub>26</sub> H <sub>26</sub> O <sub>12</sub> | 529.1356 | 529.1351 (18.5), 367.1034 (67.2), 353.0881 (0.6), 335.0780 (0.4), 193.0497 (17.8), 173.0443 (100),                                                                                                                                                                                                       | 7.09 | -0.037 | 2 | [1] |



|                              |                                               |                                                 |          |                                                                                                                                                                                                                                                                                                                                     |      |         |   |     |
|------------------------------|-----------------------------------------------|-------------------------------------------------|----------|-------------------------------------------------------------------------------------------------------------------------------------------------------------------------------------------------------------------------------------------------------------------------------------------------------------------------------------|------|---------|---|-----|
| 64.                          | 4-caffeoyl-5-feruloylquinic acid <sup>b</sup> | C <sub>26</sub> H <sub>26</sub> O <sub>12</sub> | 529.1356 | 155.0337 (4.2), 137.0231 (4.4), 134.0359 (16.3), 127.0386 (0.7), 111.0437 (2.6), 93.0330 (23.8) 529.1354 (7.2), 367.1032 (21.7), 353.0879 (55.4), 335.0784 (1.9), 203.0345 (1.8), 191.0551 (72.8), 179.0338 (66.8), 173.0443 (100), 161.0231 (11.0), 135.0437 (60.9), 111.0435 (5.0), 93.0329 (34.5), 85.0278 (7.6), 134.0359 (8.8) | 7.18 | 0.474   | 2 |     |
| 65.                          | 3,4,5-tricaffeoylquinic acid <sup>a</sup>     | C <sub>34</sub> H <sub>30</sub> O <sub>15</sub> | 677.1528 | 677.1523 (100), 515.1199 (50.2), 353.0880 (44.9), 335.0772 (14.7), 299.0559 (0.6), 255.0667 (0.8), 203.0342 (0.9), 191.0552 (41.4), 179.0339 (71.4), 173.0444 (87.5), 161.0232 (22.2), 135.0437 (74.3), 111.0437 (5.6), 93.0330 (20.3), 85.0279 (3.8)                                                                               | 7.78 | 1.605   | 1 |     |
| <b>Caffeoylhexaric acids</b> |                                               |                                                 |          |                                                                                                                                                                                                                                                                                                                                     |      |         |   |     |
| 66.                          | caffeoylhexaric acid <sup>b</sup> 1           | C <sub>15</sub> H <sub>16</sub> O <sub>11</sub> | 371.0620 | 371.0625 (36.1), 209.0295 (100), 179.0338 (3.2), 173.0086 (0.7), 161.0228 (2.2), 147.0286 (4.3), 135.0437 (0.8), 129.0178 (4.0), 111.0076 (2.4), 93.0329 (9.7), 85.0278 (48.7)                                                                                                                                                      | 1.29 | 1.470   | 2 |     |
| 67.                          | caffeoylhexaric acid <sup>b</sup> 2           | C <sub>15</sub> H <sub>16</sub> O <sub>11</sub> | 371.0620 | 371.0612 (3.1), 209.0295 (100), 191.0188 (21.5), 179.0337 (2.2), 173.0079 (1.6), 147.0286 (4.9), 135.0437 (3.9), 129.0182 (3.1), 111.0074 (2.3), 85.0278 (43.8)                                                                                                                                                                     | 1.69 | -1.979  | 2 |     |
| 68.                          | caffeoylhexaric acid <sup>b</sup> 3           | C <sub>15</sub> H <sub>16</sub> O <sub>11</sub> | 371.0620 | 371.0605 (3.0), 209.0294 (100), 173.0079 (1.6), 147.0286 (3.7), 135.0436 (2.0), 129.0178 (3.9), 111.0066 (2.0), 85.0274 (42.0)                                                                                                                                                                                                      | 1.99 | -4.028  | 2 |     |
| 69.                          | caffeoylhexaric acid <sup>b</sup> 4           | C <sub>15</sub> H <sub>16</sub> O <sub>11</sub> | 371.0620 | 371.0594 (2.5), 209.0294 (100), 191.0187 (21.0), 147.0282 (3.2), 135.0437 (1.5), 129.0176 (2.1), 111.0071 (2.2), 85.0278 (36.2)                                                                                                                                                                                                     | 2.41 | -6.956  | 2 |     |
| 70.                          | dicafeoylhexaric acid 1                       | C <sub>24</sub> H <sub>22</sub> O <sub>14</sub> | 533.0937 | 533.0938 (13.0), 371.0620 (95.9), 353.0513 (2.3), 209.0295 (100), 191.0188 (26.2), 179.0333 (3.3), 161.0236 (0.6), 173.0081 (0.7), 147.0289 (4.2), 135.0439 (5.2), 129.0177 (5.3), 111.0072 (2.9), 85.0279 (51.5)                                                                                                                   | 3.75 | 0.134   | 2 | [1] |
| 71.                          | dicafeoylhexaric acid <sup>b</sup> 2          | C <sub>24</sub> H <sub>22</sub> O <sub>14</sub> | 533.0937 | 533.0893 (13.4), 371.0618 (85.3), 209.0294 (100), 191.0186 (23.6), 179.0341 (6.3), 173.0081 (0.8), 147.0285 (3.0), 135.0436 (11.3), 129.0178 (6.6), 111.0072 (4.1), 85.0278 (48.4)                                                                                                                                                  | 4.13 | -8.213  | 2 |     |
| 72.                          | dicafeoylhexaric acid <sup>b</sup> 3          | C <sub>24</sub> H <sub>22</sub> O <sub>14</sub> | 533.0937 | 533.0862 (15.4), 371.0610 (89.8), 353.0517 (4.5), 335.0406 (0.5), 209.0295 (100), 191.0188 (28.8), 179.0340 (4.9), 161.0232 (0.9), 147.0283 (4.0), 135.0437 (14.6), 129.0179 (6.9), 111.0074 (2.8), 93.329 (4.2), 85.0278 (48.2)                                                                                                    | 4.71 | -14.066 | 2 |     |

|     |                                                           |                                                 |          |                                                                                                                                                                                                                                                        |      |         |   |     |
|-----|-----------------------------------------------------------|-------------------------------------------------|----------|--------------------------------------------------------------------------------------------------------------------------------------------------------------------------------------------------------------------------------------------------------|------|---------|---|-----|
| 73. | dicaFFEoylhexaric acid <sup>b</sup> 4                     | C <sub>24</sub> H <sub>22</sub> O <sub>14</sub> | 533.0937 | 533.0859 (15.4), 371.0615 (76.1), 353.0512 (3.3), 209.0294 (100), 191.0188 (25.7), 179.0341 (3.8), 173.0446 (4.6), 161.0234 (1.2), 147.0285 (3.2), 135.0437 (12.3), 129.0178 (6.6), 129.0178 (4.5), 111.0072 (2.7), 93.0329 (1.3), 85.0278 (49.3)      | 4.89 | -14.516 | 2 | [1] |
| 74. | dicaFFEoylhexaric acid <sup>b</sup> 5                     | C <sub>24</sub> H <sub>22</sub> O <sub>14</sub> | 533.0937 | 533.0892 (16.1), 371.0619 (91.0), 353.0510 (0.3), 209.0295 (100), 191.0188 (31.9), 179.0339 (3.7), 161.0229 (2.7), 147.0285 (5.0), 135.0438 (8.7), 129.0178 (5.7), 111.0070 (3.1), 85.0278 (55.0)                                                      | 5.15 | -8.457  | 2 |     |
| 75. | tricaFFEoylhexaric acid 1                                 | C <sub>33</sub> H <sub>28</sub> O <sub>17</sub> | 695.1254 | 695.1259 (24.2), 533.0938 (31.6), 371.0619 (19.4), 353.0510 (1.7), 209.0294 (100), 191.0148 (14.8), 179.0339 (3.8), 161.0233 (0.8), 147.0285 (3.5), 135.0437 (6.3), 129.0178 (6.1), 111.0072 (2.6), 85.0278 (37.9)                                     | 5.89 | 0.788   | 2 |     |
| 76. | tricaFFEoylhexaric acid <sup>b</sup> 2                    | C <sub>33</sub> H <sub>28</sub> O <sub>17</sub> | 695.1254 | 695.1262 (24.3), 533.0942 (34.6), 371.0622 (20.3), 353.0510 (1.7), 209.0295 (100), 191.0148 (15.6), 179.0341 (2.9), 161.0230 (2.1), 147.0287 (4.7), 135.0436 (4.7), 129.0179 (5.3), 111.0072 (2.2), 85.0279 (43.7)                                     | 6.32 | 1.219   | 2 |     |
| 77. | tricaFFEoylhexaric acid <sup>b</sup> 3                    | C <sub>33</sub> H <sub>28</sub> O <sub>17</sub> | 695.1254 | 695.1262 (21.2), 533.0941 (44.3), 371.0620 (20.5), 209.0294 (100), 191.0188 (18.6), 179.0338 (5.5), 161.0231 (2.0), 147.0285 (3.9), 135.0437 (8.0), 129.0179 (10.8), 111.0072 (2.1), 85.0279 (45.0)                                                    | 6.44 | 1.133   | 2 |     |
| 78. | tricaFFEoylhexaric acid <sup>b</sup> 4                    | C <sub>33</sub> H <sub>28</sub> O <sub>17</sub> | 695.1254 | 695.1268 (19.2), 533.0936 (51.1), 371.0621 (24.2), 209.0295 (100), 191.0188 (17.8), 179.0339 (5.4), 173.0448 (2.5), 161.0230 (4.1), 147.0285 (4.4), 135.0437 (10.6), 129.0179 (7.7), 85.0279 (45.1)                                                    | 6.53 | 2.011   | 2 |     |
| 79. | hydroxybutanyl-<br>tricaFFEoylhexaric acid <sup>b</sup> 1 | C <sub>37</sub> H <sub>34</sub> O <sub>19</sub> | 781.1622 | 781.1623 (34.0), 619.1307 (44.6), 457.0989 (38.4), 353.0515 (0.8), 295.0670 (52.9), 209.0291 (2.9), 191.0187 (78.8), 179.0338 (10.9), 173.0077 (5.3), 161.0232 (6.6), 147.0285 (16.4), 135.0437 (19.0), 129.0178 (17.4), 111.0073 (5.4), 85.0278 (100) | 6.53 | 0.177   | 2 |     |
| 80. | hydroxybutanyl-<br>tricaFFEoylhexaric acid <sup>b</sup> 2 | C <sub>37</sub> H <sub>34</sub> O <sub>19</sub> | 781.1622 | 781.1634 (42.3), 619.1310 (54.7), 457.0990 (36.0), 353.0516 (0.6), 295.0670 (65.8), 209.0289 (0.8), 191.0187 (66.9), 179.0337 (9.7), 173.0079 (4.1), 161.0234 (7.3), 147.0286 (16.6), 135.0437 (19.1), 129.0179 (17.9), 111.0072 (6.4), 85.0279 (100)  | 6.66 | 1.585   | 2 |     |
| 81. | isobutanyl-<br>tricaFFEoylhexaric acid <sup>b</sup>       | C <sub>37</sub> H <sub>34</sub> O <sub>18</sub> | 765.1672 | 765.1686 (59.7), 603.1352 (50.7), 441.1042 (35.0), 279.0720 (92.3), 191.0188 (68.4), 179.0337 (13.7), 173.0078 (4.4), 161.0231 (8.1), 147.0288 (10.5), 135.0437 (25.3), 129.0179 (14.2), 111.0073 (6.5), 85.0278 (100)                                 | 8.54 | 1.755   | 2 |     |

|                   |                                                                        |                                                 |            |                                                                                                                                                                                                                                                                                                                                                                          |      |        |   |        |
|-------------------|------------------------------------------------------------------------|-------------------------------------------------|------------|--------------------------------------------------------------------------------------------------------------------------------------------------------------------------------------------------------------------------------------------------------------------------------------------------------------------------------------------------------------------------|------|--------|---|--------|
| 82.               | 2-methylbutanyl/<br>isovaleryl-<br>tricafeoylhexaric acid <sup>b</sup> | C <sub>38</sub> H <sub>36</sub> O <sub>18</sub> | 779.1829   | 779.1841 (49.7), 617.1520 (41.8), 455.1198 (28.0),<br>293.0880 (76.2), 191.0187 (62.2), 179.0330 (15.1),<br>173.0079 (5.5), 161.0233 (6.7), 147.0286 (12.3),<br>135.0437 (27.8), 129.0179 (0.7), 111.0070 (7.1), 85.0278<br>(100)                                                                                                                                        | 9.21 | 1.531  | 2 |        |
| <b>Flavonoids</b> |                                                                        |                                                 |            |                                                                                                                                                                                                                                                                                                                                                                          |      |        |   |        |
| 83.               | myricetin <i>O</i> -hexoside                                           | C <sub>21</sub> H <sub>20</sub> O <sub>13</sub> | 479.0831   | 479.0832 (77.0), 359.0386 (0.4), 317.0301 (100),<br>287.0189 (2.0), 271.0252 (3.1), 243.0300 (1.9), 227.0343<br>(1.2), 215.0343 (0.4), 199.0387 (1.1), 178.9977 (2.0),<br>151.0025 (0.8)                                                                                                                                                                                 | 4.55 | 0.159  | 2 | [1, 2] |
| 84.               | myricetin <i>O</i> -<br>acetylhexoside                                 | C <sub>23</sub> H <sub>22</sub> O <sub>14</sub> | 521.0939 ( | 521.0939 (76.9), 461.0714 (0.2), 317.0301 (100),<br>287.0197 (2.2), 271.0249 (3.5), 243.0295 (2.2), 227.0341<br>(1.5),<br>463.0884 (100), 301.0348 (44.3), 300.0275 (71.3),<br>271.0247 (37.4), 255.0296 (16.5), 243.0296 (8.6),<br>227.0340 (2.8), 178.9973 (2.6), 163.0024 (2.2), 151.0023<br>(6.0), 121.0275 (1.5), 107.0121 (1.8)                                    | 5.19 | 0.483  | 2 | [1]    |
| 85.               | hyperoside <sup>a</sup>                                                | C <sub>21</sub> H <sub>20</sub> O <sub>12</sub> | 463.0885   | 447.0934 (100), 285.0401 (39.5), 284.0326 (57.5),<br>255.0299 (0.8), 239.0346 (0.6), 227.0340 (3.2), 211.0392<br>(2.4)<br>493.0992 (100), 331.0460 (78.6), 316.0222 (17.3),<br>287.0199 (20.4), 271.0246 (7.6), 259.0250 (4.0),<br>243.0303 (2.9), 215.0340 (2.3), 199.03962 (1.2),<br>181.0132 (4.5), 165.9895 (5.1), 139.0020 (2.3), 136.9866<br>(2.6), 121.0280 (3.7) | 5.29 | 0.520  | 1 | [1, 2] |
| 86.               | luteolin-7- <i>O</i> -glucoside <sup>a,b</sup>                         | C <sub>21</sub> H <sub>20</sub> O <sub>11</sub> | 447.0934   | 505.0991 (100), 463.0863 (1.1), 301.0345 (33.8),<br>300.0275 (79.9), 271.0247 (34.5), 255.0296 (15.0),<br>243.0295 (9.23), 227.0346 (2.5), 211.0396 (0.8),<br>199.0392 (0.5), 178.9968 (2.5), 163.0026 (1.7), 151.0024<br>(4.8), 135.0070 (0.5), 121.0270 (0.9), 107.0123 (1.8)                                                                                          | 5.31 | 0.213  | 1 |        |
| 87.               | patuletin <i>O</i> -hexoside <sup>b</sup>                              | C <sub>22</sub> H <sub>22</sub> O <sub>13</sub> | 493.0987   | 477.1038 (100), 357.0618 (0.6), 315.0465 (26.0),<br>300.0271 (15.1), 299.0197 (18.6), 271.0251 (2.9),<br>255.0299 (1.4), 243.0296 (2.9), 227.0343 (2.8), 165.9898<br>(0.6), 163.0024 (1.8), 164.9816 (1.6), 136.9867 (1.3),<br>133.0280 (12.2)                                                                                                                           | 5.50 | 0.783  | 2 |        |
| 88.               | quercetin <i>O</i> -<br>acetylhexoside <sup>b</sup> 1                  | C <sub>23</sub> H <sub>22</sub> O <sub>13</sub> | 505.0988   | 447.0934 (100), 285.0396 (23.9), 284.0326 (55.8),<br>255.0296 (44.0), 227.0344 (42.4), 211.0397 (1.5),<br>178.9980 (0.4), 163.0022 (0.4), 151.0023 (2.2), 107.0120<br>(0.9)                                                                                                                                                                                              | 5.61 | 0.666  | 2 |        |
| 89.               | nepetin <i>O</i> -hexoside <sup>b</sup>                                | C <sub>22</sub> H <sub>22</sub> O <sub>12</sub> | 447.1038   |                                                                                                                                                                                                                                                                                                                                                                          | 5.68 | -0.061 | 2 |        |
| 90.               | kaempferol 3- <i>O</i> -glucoside <sup>a</sup>                         | C <sub>21</sub> H <sub>20</sub> O <sub>11</sub> | 447.0934   |                                                                                                                                                                                                                                                                                                                                                                          | 5.88 | 0.258  | 1 | [1, 2] |

|     |                                                          |                                                 |          |                                                                                                                                                                                                                                                                   |      |        |   |        |
|-----|----------------------------------------------------------|-------------------------------------------------|----------|-------------------------------------------------------------------------------------------------------------------------------------------------------------------------------------------------------------------------------------------------------------------|------|--------|---|--------|
| 91. | isorhamnetin 3- <i>O</i> -glucoside <sup>a</sup>         | C <sub>22</sub> H <sub>22</sub> O <sub>12</sub> | 477.1038 | 477.1038 (100), 357.0618 (1.9), 315.0496 (12.6), 314.0434 (54.8), 299.0197 (4.4), 271.0248 (20.3), 257.0456 (4.5), 243.0293 (23.6), 227.0340 (3.0), 215.0349 (3.2), 199.0391 (3.0), 151.0020 (2.6)                                                                | 6.03 | -0.124 | 1 | [1, 2] |
| 92. | quercetin <i>O</i> -acetylhexoside isomer <sup>b</sup> 2 | C <sub>23</sub> H <sub>22</sub> O <sub>13</sub> | 505.0988 | 505.0983 (100), 301.0352 (97.8), 271.0247 (2.4), 255.0292 (1.9), 243.0298 (1.3), 227.0339 (1.6), 211.0392 (0.7), 161.0232 (4.8), 151.0023 (35.2), 121.0280 (8.2), 107.0123 (14.5)                                                                                 | 6.06 | -0.859 | 2 |        |
| 93. | quercetin <i>O</i> -malonylhexoside                      | C <sub>24</sub> H <sub>22</sub> O <sub>15</sub> | 549.0886 | 549.0860 (0.7), 505.0995 (100), 463.0898 (0.5), 343.0456 (2.8), 313.0360 (2.3), 301.0354 (90.3), 271.0247 (1.2), 255.0295 (1.0), 243.0303 (0.5), 227.0342 (0.8), 178.9978 (1.9), 175.0023 (4.2), 151.0023 (32.2), 121.0280 (7.1), 107.0123 (13.3)                 | 6.06 | -4.722 | 2 | [1]    |
| 94. | 6-methoxykaempferol <i>O</i> -hexoside <sup>b</sup>      | C <sub>22</sub> H <sub>22</sub> O <sub>12</sub> | 477.1038 | 477.1032 (100), 357.0626 (0.8), 314.0434 (39.7), 315.0508 (29.9), 299.0198 (19.6), 271.0247 (13.3), 255.0295 (1.6), 243.0295 (4.1), 227.0346 (2.5), 215.0343 (6.9), 199.0393 (1.5), 181.0132 (5.2), 165.9896 (14.2), 109.9993 (4.2)                               | 6.25 | -1.340 | 2 |        |
| 95. | kaempferol <i>O</i> -acetylhexoside                      | C <sub>23</sub> H <sub>22</sub> O <sub>12</sub> | 489.1038 | 489.1040 (100), 285.0401 (73.9), 255.0296 (45.1), 227.0344 (29.6), 211.0392 (2.8), 199.0388 (0.6), 163.0025 (1.3), 151.0020 (1.6), 135.0070 (1.5), 107.0122 (2.0)                                                                                                 | 6.28 | 0.308  | 2 | [1]    |
| 96. | hispidulin <i>O</i> -hexoside <sup>b</sup>               | C <sub>22</sub> H <sub>22</sub> O <sub>11</sub> | 461.1089 | 461.1093 (100), 299.0555 (8.1), 284.0313 (9.2), 283.0247 (43.5), 255.0297 (10.0), 211.0396 (1.5), 183.0441 (3.2), 163.0023 (10.1), 135.0073 (2.3), 117.0330 (7.5)                                                                                                 | 6.32 | 0.792  | 2 |        |
| 97. | jaceosidine <i>O</i> -hexoside <sup>b</sup>              | C <sub>23</sub> H <sub>24</sub> O <sub>12</sub> | 491.1195 | 491.1197 (100), 329.0664 (4.6), 314.0421 (8.6), 313.0355 (11.8), 298.0118 (11.8), 270.0167 (13.2), 257.0074 (0.9), 242.0217 (2.4), 214.0268 (1.6), 198.0312 (1.2), 165.9886 (0.4), 164.9817 (1.1), 163.0022 (2.1), 147.0437 (2.0), 136.9867 (2.0), 132.0200 (1.8) | 6.50 | 1.875  | 2 |        |
| 98. | quercetin <i>O</i> -coumaroylhexoside isomer             | C <sub>30</sub> H <sub>26</sub> O <sub>14</sub> | 609.1250 | 609.1254 (100), 463.0888 (23.6), 301.0350 (42.5), 300.0276 (60.9), 271.0248 (36.9), 255.0297 (17.6), 243.0294 (9.1), 227.0344 (2.7), 211.0400 (0.7), 199.0392 (0.6), 178.9976 (2.7), 163.0023 (1.9), 151.0023 (7.9), 121.0280 (1.5), 107.0122 (2.9)               | 7.07 | 0.643  | 2 | [1, 2] |
| 99. | quercetin <i>O</i> -feruloylhexoside <sup>b</sup>        | C <sub>31</sub> H <sub>28</sub> O <sub>15</sub> | 639.1355 | 639.1357 (100), 463.0883 (11.5), 301.0349 (29.9), 300.0276 (55.5), 271.0248 (34.5), 255.0298 (16.3), 243.0297 (9.2), 227.0342 (2.8), 211.0397 (0.9), 199.0398                                                                                                     | 7.20 | 0.308  | 2 |        |

|      |                                                                           |                                                 |          |                                                                                                                                                                                                                                                                                                                                                                                                                                                                                                                                            |      |        |   |        |
|------|---------------------------------------------------------------------------|-------------------------------------------------|----------|--------------------------------------------------------------------------------------------------------------------------------------------------------------------------------------------------------------------------------------------------------------------------------------------------------------------------------------------------------------------------------------------------------------------------------------------------------------------------------------------------------------------------------------------|------|--------|---|--------|
| 100. | quercetin <i>O</i> -coumaroylhexoside 2                                   | C <sub>30</sub> H <sub>26</sub> O <sub>14</sub> | 609.1250 | (1.8), 161.0231 (9.6), 151.0024 (7.9), 135.0438 (7.9), 121.0283 (1.3), 107.0122 (2.8) 609.1254 (100), 463.0885 (26.0), 301.0350 (51.3), 300.0275 (78.1), 283.0245 (0.3), 271.0248 (43.7), 255.0298 (19.1), 243.0295 (10.5), 227.0345 (2.6), 211.0392 (1.4), 199.0394 (0.5), 178.9975 (3.6), 163.0025 (2.2), 151.0023 (9.3), 121.0281 (1.9), 107.0123 (3.2) 285.0402 (100), 267.0292 (0.2), 257.0443 (0.2), 241.0499 (0.8), 223.0388 (0.2), 217.0499 (0.9), 199.0394 (1.7), 175.0390 (2.8), 151.0024 (4.4), 133.0280 (21.6), 107.0123 (4.1) | 7.30 | 0.643  | 2 | [1, 2] |
| 101. | luteolin <sup>a,b</sup>                                                   | C <sub>15</sub> H <sub>9</sub> O <sub>7</sub>   | 285.0406 | 301.0353 (100), 273.0406 (3.2), 257.0459 (1.1), 243.0297 (0.3), 229.6005 (0.7), 211.0389 (0.3), 178.9975 (21.6), 151.0023 (47.4), 175.0391 (0.3), 121.0280 (12.3), 107.0123 (12.9)                                                                                                                                                                                                                                                                                                                                                         | 7.58 | -0.952 | 1 |        |
| 102. | quercetin <sup>a</sup>                                                    | C <sub>15</sub> H <sub>10</sub> O <sub>7</sub>  | 301.0354 | 593.1307 (100), 447.0934 (2.7), 285.0401 (75.2), 255.0297 (42.7), 227.0343 (28.3), 211.0391 (2.5), 163.0388 (1.3), 151.0024 (3.2), 107.0121 (2.5) 331.0458 (100), 316.0223 (62.3), 287.0198 (12.6), 271.0245 (7.0), 259.0246 (3.7), 243.0303 (1.2), 242.0211 (1.2), 181.0129 (5.2), 165.9895 (18.3), 139.0023 (9.5), 136.9858 (0.6), 121.0280 (1.2), 109.9994 (11.5)                                                                                                                                                                       | 7.62 | -0.252 | 1 | [2]    |
| 103. | kaempferol <i>O</i> -coumaroylhexoside 1                                  | C <sub>30</sub> H <sub>26</sub> O <sub>13</sub> | 593.1301 | 315.0512 (82.8), 300.0276 (100), 271.0251 (0.4), 255.0295 (1.7), 243.0290 (2.0), 227.0346 (2.3)                                                                                                                                                                                                                                                                                                                                                                                                                                            | 7.69 | 1.039  | 2 | [1, 2] |
| 104. | patuletin <sup>b</sup>                                                    | C <sub>16</sub> H <sub>12</sub> O <sub>8</sub>  | 331.0464 | 315.0512 (82.8), 300.0276 (100), 271.0251 (1.2), 255.0295 (1.7), 243.0290 (2.0), 227.0346 (2.3), 201.0184 (3.7), 165.9897 (1.2), 136.9866 (9.7), 109.9904 (1.2) 623.1412 (100), 477.1039 (1.4), 315.0511 (69.2), 299.0197 (15.7), 300.0271 (10.4), 271.0248 (24.4), 255.0298 (8.9), 243.0295 (14.4), 227.0345 (4.0), 199.0395 (3.6), 151.0023 (5.0), 145.0281 (10.0), 107.0125 (1.3)                                                                                                                                                       | 7.72 | -0.304 | 2 |        |
| 105. | herbacetin methyl ether                                                   | C <sub>16</sub> H <sub>12</sub> O <sub>7</sub>  | 315.0510 | 593.1307 (100), 447.0934 (1.7), 285.0403 (69.5), 255.0296 (34.2), 227.0343 (25.2), 211.0394 (2.2), 161.0232 (2.0), 151.0021 (2.6), 135.0430 (0.7), 107.0122 (2.3)                                                                                                                                                                                                                                                                                                                                                                          | 7.76 | 0.679  | 2 | [1]    |
| 106. | nepetin <sup>b</sup>                                                      | C <sub>16</sub> H <sub>12</sub> O <sub>7</sub>  | 315.0510 | 609.1252 (100), 429.0809 (0.5), 447.0910 (0.8), 285.0404 (59.1), 255.0295 (10.2), 227.0344 (9.7), 179.0339 (24.8), 161.0232 (48.9), 135.0437 (28.8), 151.0023 (3.2), 107.0123 (1.6)                                                                                                                                                                                                                                                                                                                                                        | 7.76 | 0.679  | 2 |        |
| 107. | isorhamnetin <i>O</i> - <i>p</i> -coumaroylhexoside isomer <sup>b</sup> 1 | C <sub>31</sub> H <sub>28</sub> O <sub>14</sub> | 623.1406 |                                                                                                                                                                                                                                                                                                                                                                                                                                                                                                                                            | 7.88 | 0.981  | 2 |        |
| 108. | kaempferol <i>O</i> -coumaroylhexoside isomer 2                           | C <sub>30</sub> H <sub>26</sub> O <sub>13</sub> | 593.1301 |                                                                                                                                                                                                                                                                                                                                                                                                                                                                                                                                            | 7.95 | 1.072  | 2 | [1, 2] |
| 109. | kaempferol <i>O</i> -caffeoylhexoside <sup>b</sup>                        | C <sub>30</sub> H <sub>26</sub> O <sub>14</sub> | 609.1250 |                                                                                                                                                                                                                                                                                                                                                                                                                                                                                                                                            | 7.99 | 0.364  | 2 |        |

|      |                                                                                |                                                 |          |                                                                                                                                                                                                                                       |      |        |   |        |
|------|--------------------------------------------------------------------------------|-------------------------------------------------|----------|---------------------------------------------------------------------------------------------------------------------------------------------------------------------------------------------------------------------------------------|------|--------|---|--------|
| 110. | isorhamnetin <i>O</i> - <i>p</i> -coumaroylhexoside isomer <sup>b</sup> 2      | C <sub>31</sub> H <sub>28</sub> O <sub>14</sub> | 623.1406 | 623.1414 (100), 477.1046 (1.5), 315.0510 (74.0), 299.0197 (17.7), 300.0273 (15.6), 271.0248 (30.1), 255.0298 (10.5), 243.0290 (17.4), 227.0345 (4.6), 199.0393 (5.2), 163.0388 (2.6), 151.0023 (5.3), 145.0281 (11.7), 107.0122 (1.6) | 8.08 | 1.174  | 2 |        |
| 111. | isorhamnetin <i>O</i> -caffeoylhexoside <sup>b</sup>                           | C <sub>31</sub> H <sub>28</sub> O <sub>15</sub> | 639.1355 | 639.1359 (100), 477.1042 (2.0), 315.0512 (68.3), 301.0312 (0.9), 300.0280 (13.4), 271.0247 (17.4), 255.0290 (5.7), 243.0295 (7.9), 227.0347 (1.6), 199.0386 (0.8), 179.0339 (25.8), 161.0232 (70.4), 135.0437 (36.3), 107.0121 (0.9)  | 8.12 | 0.496  | 2 |        |
| 112. | axillarin <sup>b</sup> (quercetagetin 3,6-dimethylether)                       | C <sub>17</sub> H <sub>14</sub> O <sub>8</sub>  | 345.0616 | 345.0616 (100), 330.0382 (81.6), 315.0148 (69.7), 287.0200 (11.6), 259.0252 (3.6), 243.0298 (3.5), 231.0297 (5.3), 215.0348 (4.2), 175.0026 (3.4), 165.9892 (6.1), 149.0230 (11.2), 139.0387 (5.4), 136.9865 (0.7), 109.9994 (4.8)    | 8.19 | 0.027  | 2 |        |
| 113. | hispidulin <sup>b</sup>                                                        | C <sub>16</sub> H <sub>12</sub> O <sub>6</sub>  | 299.0561 | 299.0558 (62.0), 284.0324 (100), 256.0374 (0.8), 255.0310 (16), 227.0346 (13.1), 212.0471 (2.5), 165.9896 (0.9), 136.9866 (13.2)                                                                                                      | 8.84 | 0.430  | 2 |        |
| 114. | kaempferol <sup>a</sup>                                                        | C <sub>15</sub> H <sub>9</sub> O <sub>7</sub>   | 285.0406 | 285.0403 (100), 257.0458 (0.8), 239.0346 (1.3), 229.0446 (0.8), 211.0396 (1.0), 151.0027 (1.5), 117.0329 (1.0), 107.0127 (1.2)                                                                                                        | 8.84 | -0.531 | 1 | [2]    |
| 115. | naringenin                                                                     | C <sub>15</sub> H <sub>12</sub> O <sub>5</sub>  | 271.0612 | 271.0611 (100), 253.0504 (6.8), 243.0656 (0.7), 225.0558 (1.8), 215.0708 (1.0), 197.0600 (5.0), 151.0022 (3.4), 119.0490 (0.3), 107.0122 (2.8)                                                                                        | 8.86 | 0.468  | 1 | [1]    |
| 116. | isorhamnetin <sup>a</sup>                                                      | C <sub>16</sub> H <sub>12</sub> O <sub>7</sub>  | 315.0510 | 315.0510 (100), 300.0275 (45.7), 271.0246 (2.9), 255.0293 (1.5), 243.0296 (1.5), 227.0356 (1.2), 215.0344 (0.7), 164.0103 (3.1), 151.0024 (9.7), 107.0123 (7.7)                                                                       | 9.12 | 0.013  | 1 | [1, 2] |
| 117. | jaceosidin <sup>b</sup> (6-hydroxyluteolin-6,3'-dimethyl ether) <sup>a,b</sup> | C <sub>17</sub> H <sub>14</sub> O <sub>7</sub>  | 329.0677 | 329.0668 (83.8), 314.0434 (97.2), 299.0197 (100), 271.0247 (22.1), 255.0287 (0.8), 243.0295 (6.4), 227.0345 (4.0), 215.0341 (17.8), 199.0394 (4.8), 187.0387 (0.6), 165.9895 (16.2), 164.9815 (6.3), 136.9862 (2.0), 133.0278 (9.1)   | 9.40 | 0.286  | 1 |        |
| 118. | gnaphaliin 1                                                                   | C <sub>17</sub> H <sub>14</sub> O <sub>6</sub>  | 313.0718 | 313.0719 (94.4), 298.0482 (100), 283.0248 (95.5), 255.0296 (52.8), 239.0345 (1.5), 227.0341 (6.3), 211.0391 (3.5), 199.0392 (18.0), 183.0441 (13.1), 167.0488 (7.6), 155.0487 (6.8), 139.0538 (6.9), 127.0539 (2.2), 109.0644 (3.1)   | 9.52 | 0.443  | 2 | [1, 2] |
| 119. | quercetagetin-3,6,3'(4')-trimethyl ether <sup>b</sup> 1                        | C <sub>18</sub> H <sub>16</sub> O <sub>8</sub>  | 359.0772 | 359.0774 (100), 344.0538 (59.7), 329.0302 (80.3), 314.0070 (2.6), 301.0354 (7.6), 286.0120 (20.3), 258.0168 (15.4), 230.0213 (8.2), 202.0263 (9.0),                                                                                   | 9.66 | 0.444  | 2 |        |

|      |                                                         |                                                |          |                                                                                                                                                                                                                                                                               |       |        |   |        |
|------|---------------------------------------------------------|------------------------------------------------|----------|-------------------------------------------------------------------------------------------------------------------------------------------------------------------------------------------------------------------------------------------------------------------------------|-------|--------|---|--------|
| 120. | quercetin 7,3'(4')-dimethyl ether <sup>b</sup>          | C <sub>17</sub> H <sub>13</sub> O <sub>7</sub> | 329.0667 | 165.9895 (2.2), 163.0380 (2.1), 136.9870 (0.5), 118.0155 (1.1), 109.9997 (2.2), 329.0667 (100), 314.0432 (81.6), 299.0196 (88.2), 271.0247 (33.5), 255.0292 (0.8), 243.0295 (12.5), 227.0340 (3.0), 215.0340 (4.9), 199.0393 (13.9), 171.0439 (143.0489 (3.1), 155.0486 (6.5) | 9.71  | 0.073  | 2 |        |
| 121. | kaempferid/ <u>isokampferid</u>                         | C <sub>16</sub> H <sub>12</sub> O <sub>6</sub> | 299.0561 | 299.0561 (100), 284.0327 (77.7), 255.0296 (55.5), 239.0346 (43.4), 227.0344 (26.1), 211.0394 (14.5), 199.0388 (0.5), 109.9995 (0.3)                                                                                                                                           | 9.99  | -0.561 | 2 | [1]    |
| 122. | quercetagetin-3,6,3'(4')-trimethyl ether <sup>b</sup> 2 | C <sub>18</sub> H <sub>16</sub> O <sub>8</sub> | 359.0772 | 359.0772 (100), 344.0535 (30.5), 329.0302 (48.1), 314.0082 (2.4), 301.0359 (3.1), 286.0120 (8.6), 258.0175 (1.5), 230.0215 (3.7), 194.9925 (25.2), 179.9690 (18.7)                                                                                                            | 11.18 | -0.002 | 2 |        |
| 123. | pinocembrin                                             | C <sub>15</sub> H <sub>12</sub> O <sub>4</sub> | 255.0663 | 255.0659 (100), 227.0703 (0.3), 211.0758 (1.8), 183.0808 (0.3), 151.0024 (5.4), 107.0123 (5.9)                                                                                                                                                                                | 11.63 | -1.302 | 2 | [1, 2] |
| 124. | galangin                                                | C <sub>15</sub> H <sub>10</sub> O <sub>5</sub> | 269.0457 | 269.0453 (100), 239.0347 (0.6), 227.0348 (0.7), 223.0402 (1.0), 213.0552 (1.5), 195.0446 (1.1), 185.0592 (0.5), 169.0647 (1.9), 143.0489 (1.3), 107.0121 (0.2), 101.0379 (0.2)                                                                                                | 11.74 | -0.954 | 2 | [2]    |
| 125. | gnaphaliin 2                                            | C <sub>17</sub> H <sub>14</sub> O <sub>6</sub> | 313.0718 | 313.0718 (100), 298.0481 (88.6), 283.0246 (74.6), 255.0296 (0.4), 239.0343 (0.5), 227.0343 (4.4), 211.0387 (2.8), 199.0392 (12.6), 183.0441 (7.9), 167.0492 (5.2), 155.0486 (4.7), 139.0538 (4.7), 127.0538 (2.4), 117.0328 (0.3)                                             | 12.19 | 0.123  | 2 | [1, 2] |
| 126. | galangin methyl ether                                   | C <sub>16</sub> H <sub>12</sub> O <sub>5</sub> | 283.0612 | 283.0611 (100), 268.0376 (77.3), 239.0346 (54.3), 211.0393 (76.2), 195.0439 (2.0), 167.0485 (2.3)                                                                                                                                                                             | 12.27 | -0.342 | 2 | [1]    |

#### Pyrones (phloroglucinol alpha-pyrones)

| No   | Subclass (tentatively identified compound) | Molecular formula                              | Exact mass [M-H] <sup>-</sup> | Fragmentation pattern in (-) ESI-MS/MS                                                                                                                                                                                                               | t <sub>R</sub> (min) | Δ ppm  | Level of confidence | References |
|------|--------------------------------------------|------------------------------------------------|-------------------------------|------------------------------------------------------------------------------------------------------------------------------------------------------------------------------------------------------------------------------------------------------|----------------------|--------|---------------------|------------|
| 127. | ethylpyrones A <sup>b,c</sup>              | C <sub>22</sub> H <sub>26</sub> O <sub>8</sub> | 417.1555                      | 417.1557 (42.8), 263.0929 (3.2), 251.0922 (100), 233.0815 (1.4), 205.0496 (0.4), 193.0496 (18.1), 179.0339 (3.1), 153.0544 (73.5), 109.0643 (49.0)                                                                                                   | 13.15                | 0.429  | 3                   |            |
| 128. | ethylpyrones <sup>b,c</sup>                | C <sub>22</sub> H <sub>26</sub> O <sub>9</sub> | 433.1504                      | 433.1502 (66.6), 378.0953 (4.1), 346.1021 (0.7), 279.0871 (33.1), 267.0872 (100), 261.0765 (1.9), 249.0764 (2.8), 235.0970 (32.1), 223.0969 (49.7), 193.0496 (0.4), 179.0338 (0.4), 179.1065 (17.6), 151.0387 (9.5), 125.0592 (11.0), 109.0643 (4.7) | 13.46                | -0.475 | 3                   |            |
| 129. | ethylpyrones <sup>b,c</sup>                | C <sub>24</sub> H <sub>28</sub> O <sub>8</sub> | 443.1711                      | 443.1710 (100), 289.1081 (81.5), 277.1079 (74.3), 271.0970 (1.6), 259.0973 (19.0), 247.0974 (2.3),                                                                                                                                                   | 14.15                | -0.341 | 3                   |            |

|      |                                 |                                                |          |                                                                                                                                                                                                                                                                                                                                                                                                                                                                                                                                                                                                                                                                                                                                                                                                                                                                                                                                                                                                                                                                                                                                                                                                                                                                                                                                                                                                                                                                                                                                                                                                                                                                                                                                                                                                                                                                             |       |        |   |     |
|------|---------------------------------|------------------------------------------------|----------|-----------------------------------------------------------------------------------------------------------------------------------------------------------------------------------------------------------------------------------------------------------------------------------------------------------------------------------------------------------------------------------------------------------------------------------------------------------------------------------------------------------------------------------------------------------------------------------------------------------------------------------------------------------------------------------------------------------------------------------------------------------------------------------------------------------------------------------------------------------------------------------------------------------------------------------------------------------------------------------------------------------------------------------------------------------------------------------------------------------------------------------------------------------------------------------------------------------------------------------------------------------------------------------------------------------------------------------------------------------------------------------------------------------------------------------------------------------------------------------------------------------------------------------------------------------------------------------------------------------------------------------------------------------------------------------------------------------------------------------------------------------------------------------------------------------------------------------------------------------------------------|-------|--------|---|-----|
| 130. | isopropylpyrones <sup>b,c</sup> | C <sub>23</sub> H <sub>28</sub> O <sub>9</sub> | 447.1661 | 235.0974 (2.4), 191.0341 (1.7), 179.0336 (6.4), 167.0337 (18.4), 153.0544 (7.5), 123.0435 (7.6), 109.0643 (11.5), 447.1660 (76.3), 279.00872 (28.8), 267.0872 (100), 253.0715 (8.8), 235.0970 (33.6), 223.0970 (56.7), 209.0807 (4.0), 179.1066 (17.3), 167.0703 (2.0), 151.0386 (10.5), 125.0594 (11.0), 97.0278 (3.4), 387.1450 (64.2), 247.0972 (85.5), 235.0970 (100), 205.0860 (6.3), 191.1068 (11.3), 187.0753 (0.7), 166.0262 (4.6), 161.0959 (2.9), 133.0643 (0.8), 123.0435 (2.7), 109.0640 (5.1), 95.0486 (16.1), 485.2183 (100), 331.1552 (57.5), 319.1550 (72.4), 289.1454 (0.4), 277.1455 (1.5), 258.1167 (0.3), 191.0340 (6.2), 179.0340 (10.4), 166.0261 (3.9), 153.0544 (8.7), 137.0229 (3.6), 109.0641 (11.3), 361.1660 (95.7), 317.1757 (100), 273.1859 (8.2), 205.0500 (6.2), 193.0497 (22.3), 165.0542 (0.5), 163.0382 (3.9), 151.0388 (6.2), 123.0431 (1.7), 107.0484 (0.9), 447.1659 (100), 293.1031 (61.8), 281.1029 (55.9), 261.0767 (23.3), 249.0765 (49.7), 233.0814 (23.5), 221.0812 (35.1), 153.0544 (7.7), 137.0230 (7.8), 109.0643 (8.0), 401.1605 (75.7), 247.0972 (82.9), 235.0970 (100), 219.1019 (0.8), 205.0857 (5.5), 191.1067 (13.4), 187.0760 (0.6), 166.0257 (6.6), 153.0543 (15.1), 123.0436 (1.2), 109.0641 (18.1), 485.2181 (100), 331.1552 (75.7), 319.1550 (97.9), 277.1438 (3.0), 205.0498 (11.6), 191.0334 (3.2), 179.0335 (2.1), 166.0260 (7.5), 153.0543 (8.8), 123.0437 (4.3), 109.0643 (10.2), 461.1796 (11.4), 307.1194 (13.6), 295.1187 (100), 251.1286 (3.6), 207.0656 (3.4), 153.0544 (32.4), 109.0643 (45.5), 459.2023 (63.4), 305.1397 (6.7), 293.1394 (100), 279.1239 (4.2), 247.0981 (2.6), 235.0971 (14.0), 221.0806 (2.9), 191.1066 (4.9), 153.0544 (68.2), 109.0643 (55.5), 415.1762 (76.3), 247.0972 (78.9), 235.0970 (100), 205.0869 (4.1), 191.1068 (8.9), 167.0701 (12.5), 123.0800 (16.7), 109.0643 (1.0) | 14.52 | -0.147 | 3 |     |
| 131. | methylpyrones (arenol)          | C <sub>21</sub> H <sub>24</sub> O <sub>7</sub> | 387.1449 | 205.0860 (6.3), 191.1068 (11.3), 187.0753 (0.7), 166.0262 (4.6), 161.0959 (2.9), 133.0643 (0.8), 123.0435 (2.7), 109.0640 (5.1), 95.0486 (16.1), 485.2183 (100), 331.1552 (57.5), 319.1550 (72.4), 289.1454 (0.4), 277.1455 (1.5), 258.1167 (0.3), 191.0340 (6.2), 179.0340 (10.4), 166.0261 (3.9), 153.0544 (8.7), 137.0229 (3.6), 109.0641 (11.3), 361.1660 (95.7), 317.1757 (100), 273.1859 (8.2), 205.0500 (6.2), 193.0497 (22.3), 165.0542 (0.5), 163.0382 (3.9), 151.0388 (6.2), 123.0431 (1.7), 107.0484 (0.9), 447.1659 (100), 293.1031 (61.8), 281.1029 (55.9), 261.0767 (23.3), 249.0765 (49.7), 233.0814 (23.5), 221.0812 (35.1), 153.0544 (7.7), 137.0230 (7.8), 109.0643 (8.0), 401.1605 (75.7), 247.0972 (82.9), 235.0970 (100), 219.1019 (0.8), 205.0857 (5.5), 191.1067 (13.4), 187.0760 (0.6), 166.0257 (6.6), 153.0543 (15.1), 123.0436 (1.2), 109.0641 (18.1), 485.2181 (100), 331.1552 (75.7), 319.1550 (97.9), 277.1438 (3.0), 205.0498 (11.6), 191.0334 (3.2), 179.0335 (2.1), 166.0260 (7.5), 153.0543 (8.8), 123.0437 (4.3), 109.0643 (10.2), 461.1796 (11.4), 307.1194 (13.6), 295.1187 (100), 251.1286 (3.6), 207.0656 (3.4), 153.0544 (32.4), 109.0643 (45.5), 459.2023 (63.4), 305.1397 (6.7), 293.1394 (100), 279.1239 (4.2), 247.0981 (2.6), 235.0971 (14.0), 221.0806 (2.9), 191.1066 (4.9), 153.0544 (68.2), 109.0643 (55.5), 415.1762 (76.3), 247.0972 (78.9), 235.0970 (100), 205.0869 (4.1), 191.1068 (8.9), 167.0701 (12.5), 123.0800 (16.7), 109.0643 (1.0)                                                                                                                                                                                                                                                                                                                                                                            | 14.65 | 0.087  | 2 | [3] |
| 132. | ethylpyrones <sup>b,c</sup>     | C <sub>27</sub> H <sub>34</sub> O <sub>8</sub> | 485.2181 | 289.1454 (0.4), 277.1455 (1.5), 258.1167 (0.3), 191.0340 (6.2), 179.0340 (10.4), 166.0261 (3.9), 153.0544 (8.7), 137.0229 (3.6), 109.0641 (11.3), 361.1660 (95.7), 317.1757 (100), 273.1859 (8.2), 205.0500 (6.2), 193.0497 (22.3), 165.0542 (0.5), 163.0382 (3.9), 151.0388 (6.2), 123.0431 (1.7), 107.0484 (0.9), 447.1659 (100), 293.1031 (61.8), 281.1029 (55.9), 261.0767 (23.3), 249.0765 (49.7), 233.0814 (23.5), 221.0812 (35.1), 153.0544 (7.7), 137.0230 (7.8), 109.0643 (8.0), 401.1605 (75.7), 247.0972 (82.9), 235.0970 (100), 219.1019 (0.8), 205.0857 (5.5), 191.1067 (13.4), 187.0760 (0.6), 166.0257 (6.6), 153.0543 (15.1), 123.0436 (1.2), 109.0641 (18.1), 485.2181 (100), 331.1552 (75.7), 319.1550 (97.9), 277.1438 (3.0), 205.0498 (11.6), 191.0334 (3.2), 179.0335 (2.1), 166.0260 (7.5), 153.0543 (8.8), 123.0437 (4.3), 109.0643 (10.2), 461.1796 (11.4), 307.1194 (13.6), 295.1187 (100), 251.1286 (3.6), 207.0656 (3.4), 153.0544 (32.4), 109.0643 (45.5), 459.2023 (63.4), 305.1397 (6.7), 293.1394 (100), 279.1239 (4.2), 247.0981 (2.6), 235.0971 (14.0), 221.0806 (2.9), 191.1066 (4.9), 153.0544 (68.2), 109.0643 (55.5), 415.1762 (76.3), 247.0972 (78.9), 235.0970 (100), 205.0869 (4.1), 191.1068 (8.9), 167.0701 (12.5), 123.0800 (16.7), 109.0643 (1.0)                                                                                                                                                                                                                                                                                                                                                                                                                                                                                                                                                                               | 14.89 | 0.472  | 3 |     |
| 133. | unknown <sup>b,c</sup>          | C <sub>20</sub> H <sub>26</sub> O <sub>6</sub> | 361.1657 | 205.0500 (6.2), 193.0497 (22.3), 165.0542 (0.5), 163.0382 (3.9), 151.0388 (6.2), 123.0431 (1.7), 107.0484 (0.9), 447.1659 (100), 293.1031 (61.8), 281.1029 (55.9), 261.0767 (23.3), 249.0765 (49.7), 233.0814 (23.5), 221.0812 (35.1), 153.0544 (7.7), 137.0230 (7.8), 109.0643 (8.0), 401.1605 (75.7), 247.0972 (82.9), 235.0970 (100), 219.1019 (0.8), 205.0857 (5.5), 191.1067 (13.4), 187.0760 (0.6), 166.0257 (6.6), 153.0543 (15.1), 123.0436 (1.2), 109.0641 (18.1), 485.2181 (100), 331.1552 (75.7), 319.1550 (97.9), 277.1438 (3.0), 205.0498 (11.6), 191.0334 (3.2), 179.0335 (2.1), 166.0260 (7.5), 153.0543 (8.8), 123.0437 (4.3), 109.0643 (10.2), 461.1796 (11.4), 307.1194 (13.6), 295.1187 (100), 251.1286 (3.6), 207.0656 (3.4), 153.0544 (32.4), 109.0643 (45.5), 459.2023 (63.4), 305.1397 (6.7), 293.1394 (100), 279.1239 (4.2), 247.0981 (2.6), 235.0971 (14.0), 221.0806 (2.9), 191.1066 (4.9), 153.0544 (68.2), 109.0643 (55.5), 415.1762 (76.3), 247.0972 (78.9), 235.0970 (100), 205.0869 (4.1), 191.1068 (8.9), 167.0701 (12.5), 123.0800 (16.7), 109.0643 (1.0)                                                                                                                                                                                                                                                                                                                                                                                                                                                                                                                                                                                                                                                                                                                                                                                  | 15.07 | 0.937  | 3 |     |
| 134. | ethylpyrones <sup>b,c</sup>     | C <sub>23</sub> H <sub>28</sub> O <sub>9</sub> | 447.1661 | 447.1659 (100), 293.1031 (61.8), 281.1029 (55.9), 261.0767 (23.3), 249.0765 (49.7), 233.0814 (23.5), 221.0812 (35.1), 153.0544 (7.7), 137.0230 (7.8), 109.0643 (8.0), 401.1605 (75.7), 247.0972 (82.9), 235.0970 (100), 219.1019 (0.8), 205.0857 (5.5), 191.1067 (13.4), 187.0760 (0.6), 166.0257 (6.6), 153.0543 (15.1), 123.0436 (1.2), 109.0641 (18.1), 485.2181 (100), 331.1552 (75.7), 319.1550 (97.9), 277.1438 (3.0), 205.0498 (11.6), 191.0334 (3.2), 179.0335 (2.1), 166.0260 (7.5), 153.0543 (8.8), 123.0437 (4.3), 109.0643 (10.2), 461.1796 (11.4), 307.1194 (13.6), 295.1187 (100), 251.1286 (3.6), 207.0656 (3.4), 153.0544 (32.4), 109.0643 (45.5), 459.2023 (63.4), 305.1397 (6.7), 293.1394 (100), 279.1239 (4.2), 247.0981 (2.6), 235.0971 (14.0), 221.0806 (2.9), 191.1066 (4.9), 153.0544 (68.2), 109.0643 (55.5), 415.1762 (76.3), 247.0972 (78.9), 235.0970 (100), 205.0869 (4.1), 191.1068 (8.9), 167.0701 (12.5), 123.0800 (16.7), 109.0643 (1.0)                                                                                                                                                                                                                                                                                                                                                                                                                                                                                                                                                                                                                                                                                                                                                                                                                                                                                                   | 15.23 | -0.370 | 3 |     |
| 135. | ethylpyrones (arzanol)          | C <sub>22</sub> H <sub>26</sub> O <sub>7</sub> | 401.1606 | 401.1605 (75.7), 247.0972 (82.9), 235.0970 (100), 219.1019 (0.8), 205.0857 (5.5), 191.1067 (13.4), 187.0760 (0.6), 166.0257 (6.6), 153.0543 (15.1), 123.0436 (1.2), 109.0641 (18.1), 485.2181 (100), 331.1552 (75.7), 319.1550 (97.9), 277.1438 (3.0), 205.0498 (11.6), 191.0334 (3.2), 179.0335 (2.1), 166.0260 (7.5), 153.0543 (8.8), 123.0437 (4.3), 109.0643 (10.2), 461.1796 (11.4), 307.1194 (13.6), 295.1187 (100), 251.1286 (3.6), 207.0656 (3.4), 153.0544 (32.4), 109.0643 (45.5), 459.2023 (63.4), 305.1397 (6.7), 293.1394 (100), 279.1239 (4.2), 247.0981 (2.6), 235.0971 (14.0), 221.0806 (2.9), 191.1066 (4.9), 153.0544 (68.2), 109.0643 (55.5), 415.1762 (76.3), 247.0972 (78.9), 235.0970 (100), 205.0869 (4.1), 191.1068 (8.9), 167.0701 (12.5), 123.0800 (16.7), 109.0643 (1.0)                                                                                                                                                                                                                                                                                                                                                                                                                                                                                                                                                                                                                                                                                                                                                                                                                                                                                                                                                                                                                                                                         | 15.76 | -0.140 | 2 | [3] |
| 136. | ethylpyrones <sup>b,c</sup>     | C <sub>27</sub> H <sub>34</sub> O <sub>8</sub> | 485.2181 | 485.2181 (100), 331.1552 (75.7), 319.1550 (97.9), 277.1438 (3.0), 205.0498 (11.6), 191.0334 (3.2), 179.0335 (2.1), 166.0260 (7.5), 153.0543 (8.8), 123.0437 (4.3), 109.0643 (10.2), 461.1796 (11.4), 307.1194 (13.6), 295.1187 (100), 251.1286 (3.6), 207.0656 (3.4), 153.0544 (32.4), 109.0643 (45.5), 459.2023 (63.4), 305.1397 (6.7), 293.1394 (100), 279.1239 (4.2), 247.0981 (2.6), 235.0971 (14.0), 221.0806 (2.9), 191.1066 (4.9), 153.0544 (68.2), 109.0643 (55.5), 415.1762 (76.3), 247.0972 (78.9), 235.0970 (100), 205.0869 (4.1), 191.1068 (8.9), 167.0701 (12.5), 123.0800 (16.7), 109.0643 (1.0)                                                                                                                                                                                                                                                                                                                                                                                                                                                                                                                                                                                                                                                                                                                                                                                                                                                                                                                                                                                                                                                                                                                                                                                                                                                              | 15.81 | 0.101  | 3 |     |
| 137. | ethylpyrones <sup>b,c</sup>     | C <sub>24</sub> H <sub>30</sub> O <sub>9</sub> | 461.1817 | 461.1796 (11.4), 307.1194 (13.6), 295.1187 (100), 251.1286 (3.6), 207.0656 (3.4), 153.0544 (32.4), 109.0643 (45.5), 459.2023 (63.4), 305.1397 (6.7), 293.1394 (100), 279.1239 (4.2), 247.0981 (2.6), 235.0971 (14.0), 221.0806 (2.9), 191.1066 (4.9), 153.0544 (68.2), 109.0643 (55.5), 415.1762 (76.3), 247.0972 (78.9), 235.0970 (100), 205.0869 (4.1), 191.1068 (8.9), 167.0701 (12.5), 123.0800 (16.7), 109.0643 (1.0)                                                                                                                                                                                                                                                                                                                                                                                                                                                                                                                                                                                                                                                                                                                                                                                                                                                                                                                                                                                                                                                                                                                                                                                                                                                                                                                                                                                                                                                  | 16.30 | 0.012  | 3 |     |
| 138. | ethylpyrones B <sup>b,c</sup>   | C <sub>25</sub> H <sub>32</sub> O <sub>8</sub> | 459.2024 | 459.2023 (63.4), 305.1397 (6.7), 293.1394 (100), 279.1239 (4.2), 247.0981 (2.6), 235.0971 (14.0), 221.0806 (2.9), 191.1066 (4.9), 153.0544 (68.2), 109.0643 (55.5), 415.1762 (76.3), 247.0972 (78.9), 235.0970 (100), 205.0869 (4.1), 191.1068 (8.9), 167.0701 (12.5), 123.0800 (16.7), 109.0643 (1.0)                                                                                                                                                                                                                                                                                                                                                                                                                                                                                                                                                                                                                                                                                                                                                                                                                                                                                                                                                                                                                                                                                                                                                                                                                                                                                                                                                                                                                                                                                                                                                                      | 17.01 | -0.307 | 3 |     |
| 139. | isopropylpyrones <sup>b,c</sup> | C <sub>23</sub> H <sub>28</sub> O <sub>7</sub> | 415.1751 | 415.1762 (76.3), 247.0972 (78.9), 235.0970 (100), 205.0869 (4.1), 191.1068 (8.9), 167.0701 (12.5), 123.0800 (16.7), 109.0643 (1.0)                                                                                                                                                                                                                                                                                                                                                                                                                                                                                                                                                                                                                                                                                                                                                                                                                                                                                                                                                                                                                                                                                                                                                                                                                                                                                                                                                                                                                                                                                                                                                                                                                                                                                                                                          | 17.05 | 0.033  | 3 |     |



|      |                                                                    |                                                |           |                                                                                                                                                                                     |       |        |   |           |
|------|--------------------------------------------------------------------|------------------------------------------------|-----------|-------------------------------------------------------------------------------------------------------------------------------------------------------------------------------------|-------|--------|---|-----------|
| 140. | ethylpyrones <sup>b,c</sup>                                        | C <sub>22</sub> H <sub>26</sub> O <sub>8</sub> | 417.1555  | 417.1554 (87.9), 263.0923 (76.6), 251.0922 (100), 233.0814 (12.9), 217.0517 (0.4), 209.0815 (1.4), 193.0490 (4.2), 164.0466 (12.3), 179.0341 (3.8), 153.0542 (4.8), 109.0644 (6.6)  | 17.11 | -0.146 | 3 |           |
| 141. | ethylpyrones <sup>b,c</sup>                                        | C <sub>23</sub> H <sub>28</sub> O <sub>7</sub> | 415.1751  | 415.1763 (91.5), 261.1131 (78.0), 249.1129 (100), 243.1026 (0.4), 233.1191 (0.4), 217.1221 (0.6), 205.1225 (10.0), 193.0859 (4.8), 180.0418 (3.3), 153.0545 (12.4), 109.0643 (16.4) | 17.81 | 0.177( | 3 |           |
| 142. | ethylpyrone <sup>b,c</sup>                                         | C <sub>24</sub> H <sub>28</sub> O <sub>8</sub> | 443.1711. | 443.1709 (64.4), 289.1081 (21.4), 277.1079 (64.0), 235.0967 (1.8), 205.0862 (46.3), 193.0860 (100), 153.0543 (7.5), 109.0643 (14.4)                                                 | 17.89 | -0.476 | 2 |           |
| 143. | 1-methyl-propylpyrones <sup>b,c</sup>                              | C <sub>24</sub> H <sub>30</sub> O <sub>7</sub> | 429.1919  | 429.1917 (83.2), 247.0972 (77.5), 235.0970 (98.8), 205.0863 (4.9), 191.1069 (12.5), 181.0857 (13.4), 137.0958 (15.7), 150.0314 (3.2), 109.0642 (1.7)                                | 18.55 | -0.458 | 3 |           |
| 144. | isopropylpyrone <sup>b,c</sup>                                     | C <sub>23</sub> H <sub>28</sub> O <sub>8</sub> | 431.1711  | 431.1769 (95.2), 263.0923 (70.3), 251.0922 (100), 233.0815 (16.4), 209.0800 (1.2), 193.0496 (5.1), 179.0336 (4.8), 167.0701 (5.7), 164.0467 (16.4), 123.0800 (2.1), 109.0646 (0.4)  | 19.06 | -0.489 | 3 |           |
| 145. | unknown <sup>b,c</sup>                                             | C <sub>23</sub> H <sub>32</sub> O <sub>6</sub> | 403.2126  | 403.2127 (100), 385.2027 (0.6), 359.2229 (62.3), 315.2324 (5.8), 247.0974 (2.3), 235.0972 (11.8), 217.0857 (1.6), 207.1016 (0.6), 191.0338 (1.5), 151.0388 (4.0), 125.0594 (6.4)    | 19.22 | 0.128  | 3 |           |
| 146. | ethylpyrones <sup>b</sup><br>(6- <i>O</i> -desmethyl-auricepyrone) | C <sub>24</sub> H <sub>30</sub> O <sub>7</sub> | 429.1919  | 429.1917 (91.5), 275.1288 (82.2), 263.1286 (100), 257.1179 (0.9), 245.1179 (0.8), 229.1234 (0.8), 219.1383 (11.0), 193.0863 (3.5), 153.0543 (14.5), 109.0643 (24.2)                 | 19.57 | -0.458 | 2 | [4, 5]    |
| 147. | ethylpyrones <sup>b,c</sup>                                        | C <sub>23</sub> H <sub>28</sub> O <sub>8</sub> | 431.1711  | 431.1707 (100), 277.1079 (70.3), 265.1079 (90.6), 247.0973 (13.5), 221.1177 (0.7), 207.0647 (4.5), 193.0496 (4.2), 178.0624 (11.7), 153.0542 (6.9), 109.0642 (10.7),                | 19.86 | -0.976 | 3 |           |
| 148. | methylpyrones <sup>b</sup>                                         | C <sub>26</sub> H <sub>32</sub> O <sub>7</sub> | 455.2075  | 455.2078 (100), 315.1602 (73.8), 303.1601 (88.1), 273.1501 (1.3), 259.1696 (4.3), 246.0892 (1.5), 231.0652 (3.1), 218.0939 (0.8), 179.0339 (12.2), 139.0386 (12.2)                  | 20.19 | 0.513  | 3 | [1, 6, 7] |
| 149. | 1-methyl-propylpyrones<br>(heliarzanol/isobar)                     | C <sub>24</sub> H <sub>30</sub> O <sub>8</sub> | 445.1868  | 445.1865 (97.8), 263.0922 (67.0), 251.0922 (100), 245.0827 (0.5), 233.0813 (14.9), 209.0819 (1.0), 193.0494 (4.6), 181.0861 (6.0), 137.0958 (8.8), 109.0642 (1.5)                   | 20.39 | -0.744 | 3 |           |
| 150. | 1-methyl-propylpyrones <sup>b,c</sup>                              | C <sub>24</sub> H <sub>28</sub> O <sub>7</sub> | 427.1762  | 427.1737 (19.5), 245.0809 (0.8), 233.0814 (100), 189.0909 (7.5), 181.0859 (59.0), 137.0957 (43.2), 109.0648 (0.4)                                                                   | 20.42 | -5.914 | 3 |           |

| 151.            | ethylpyrones <sup>b</sup><br>(23-methyl-6- <i>O</i> -<br>desmethyllauricepyrone) | C <sub>25</sub> H <sub>32</sub> O <sub>7</sub> | 443.2075.     | 443.2075 (64.4), 289.1445 (78.4), 277.1442 (100),<br>233.1544 (8.6), 219.0656 (3.8), 205.0496 (4.6), 193.0860<br>(3.2), 153.0543 (14.0), 109.0643 (16.3<br>445.1867 (100), 291.1237 (61.3), 279.1235 (84.8),<br>273.1115 (0.6), 261.1133 (11.0), 221.0808 (6.0),<br>165.0907 (4.7), 153.0546 (5.3), 109.0642 (19.4)<br>469.2232 (100), 315.1600 (49.9), 303.1601 (60.2),<br>273.1493 (1.0), 259.1696 (3.4), 245.0810 (1.0), 231.0660<br>(1.9), 191.0338 (5.8), 179.0340 (10.8), 166.0260 (12.6),<br>153.0546 (7.0), 109.0643 (8.7)<br>459.2026 (100), 305.1395 (58.8), 293.1395 (80.5),<br>275.1289 (9.7), 235.0976 (3.1), 219.0654 (13.9),<br>191.0704 (0.8), 179.1066 (3.9), 153.0542 (4.5), 109.0642<br>(8.8)<br>485.2181 (100), 331.1551 (50.4), 319.1549 (66.3),<br>301.1446 (6.1), 289.1440 (0.5), 277.1442 (1.3), 219.0649<br>(0.8), 193.0499 (2.8), 179.0338 (4.7), 153.0541 (4.5),<br>137.0593 (3.3), 109.0693 (3.7)<br>427.1763 (22.3), 273.1131 (3.9), 261.1129 (100),<br>243.1017 (0.4), 217.1223 (4.0), 199.1114 (0.5), 191.0701<br>(1.6), 153.0543 (46.5), 109.0643 (43.1)<br>483.2388 (89.2), 315.1600 (78.8), 303.1601 (100),<br>273.1496 (1.8), 259.1699 (4.5), 191.0341 (9.1), 179.0338<br>(16.9), 167.0701 (3.7), 166.0259 (5.1), 123.0801 (17.0)<br>427.1762 (40.7), 273.1133 (15.0), 261.1129 (100),<br>217.1226 (2.6), 191.0702 (18.9), 153.0543 (18.9),<br>109.0642 (15.9) | 20.73                   | -0.060 | 3                      | [5, 8]         |
|-----------------|----------------------------------------------------------------------------------|------------------------------------------------|---------------|---------------------------------------------------------------------------------------------------------------------------------------------------------------------------------------------------------------------------------------------------------------------------------------------------------------------------------------------------------------------------------------------------------------------------------------------------------------------------------------------------------------------------------------------------------------------------------------------------------------------------------------------------------------------------------------------------------------------------------------------------------------------------------------------------------------------------------------------------------------------------------------------------------------------------------------------------------------------------------------------------------------------------------------------------------------------------------------------------------------------------------------------------------------------------------------------------------------------------------------------------------------------------------------------------------------------------------------------------------------------------------------------------|-------------------------|--------|------------------------|----------------|
| 152.            | ethylpyrones<br>(heliarzanol/isobar)                                             | C <sub>24</sub> H <sub>30</sub> O <sub>8</sub> | 445.1868      | 273.1115 (0.6), 261.1133 (11.0), 221.0808 (6.0),<br>165.0907 (4.7), 153.0546 (5.3), 109.0642 (19.4)<br>469.2232 (100), 315.1600 (49.9), 303.1601 (60.2),<br>273.1493 (1.0), 259.1696 (3.4), 245.0810 (1.0), 231.0660<br>(1.9), 191.0338 (5.8), 179.0340 (10.8), 166.0260 (12.6),<br>153.0546 (7.0), 109.0643 (8.7)<br>459.2026 (100), 305.1395 (58.8), 293.1395 (80.5),<br>275.1289 (9.7), 235.0976 (3.1), 219.0654 (13.9),<br>191.0704 (0.8), 179.1066 (3.9), 153.0542 (4.5), 109.0642<br>(8.8)<br>485.2181 (100), 331.1551 (50.4), 319.1549 (66.3),<br>301.1446 (6.1), 289.1440 (0.5), 277.1442 (1.3), 219.0649<br>(0.8), 193.0499 (2.8), 179.0338 (4.7), 153.0541 (4.5),<br>137.0593 (3.3), 109.0693 (3.7)<br>427.1763 (22.3), 273.1131 (3.9), 261.1129 (100),<br>243.1017 (0.4), 217.1223 (4.0), 199.1114 (0.5), 191.0701<br>(1.6), 153.0543 (46.5), 109.0643 (43.1)<br>483.2388 (89.2), 315.1600 (78.8), 303.1601 (100),<br>273.1496 (1.8), 259.1699 (4.5), 191.0341 (9.1), 179.0338<br>(16.9), 167.0701 (3.7), 166.0259 (5.1), 123.0801 (17.0)<br>427.1762 (40.7), 273.1133 (15.0), 261.1129 (100),<br>217.1226 (2.6), 191.0702 (18.9), 153.0543 (18.9),<br>109.0642 (15.9)                                                                                                                                                                                                                 | 21.00                   | -0.182 | 2                      | [1, 6]         |
| 153.            | ethylpyrones <sup>b</sup>                                                        | C <sub>27</sub> H <sub>34</sub> O <sub>7</sub> | 469.2232      | 273.1493 (1.0), 259.1696 (3.4), 245.0810 (1.0), 231.0660<br>(1.9), 191.0338 (5.8), 179.0340 (10.8), 166.0260 (12.6),<br>153.0546 (7.0), 109.0643 (8.7)<br>459.2026 (100), 305.1395 (58.8), 293.1395 (80.5),<br>275.1289 (9.7), 235.0976 (3.1), 219.0654 (13.9),<br>191.0704 (0.8), 179.1066 (3.9), 153.0542 (4.5), 109.0642<br>(8.8)<br>485.2181 (100), 331.1551 (50.4), 319.1549 (66.3),<br>301.1446 (6.1), 289.1440 (0.5), 277.1442 (1.3), 219.0649<br>(0.8), 193.0499 (2.8), 179.0338 (4.7), 153.0541 (4.5),<br>137.0593 (3.3), 109.0693 (3.7)<br>427.1763 (22.3), 273.1131 (3.9), 261.1129 (100),<br>243.1017 (0.4), 217.1223 (4.0), 199.1114 (0.5), 191.0701<br>(1.6), 153.0543 (46.5), 109.0643 (43.1)<br>483.2388 (89.2), 315.1600 (78.8), 303.1601 (100),<br>273.1496 (1.8), 259.1699 (4.5), 191.0341 (9.1), 179.0338<br>(16.9), 167.0701 (3.7), 166.0259 (5.1), 123.0801 (17.0)<br>427.1762 (40.7), 273.1133 (15.0), 261.1129 (100),<br>217.1226 (2.6), 191.0702 (18.9), 153.0543 (18.9),<br>109.0642 (15.9)                                                                                                                                                                                                                                                                                                                                                                             | 21.23                   | 0.050  | 2                      | [7]            |
| 154.            | ethylpyrones B <sup>b,c</sup>                                                    | C <sub>25</sub> H <sub>32</sub> O <sub>8</sub> | 459.2024      | 275.1289 (9.7), 235.0976 (3.1), 219.0654 (13.9),<br>191.0704 (0.8), 179.1066 (3.9), 153.0542 (4.5), 109.0642<br>(8.8)<br>485.2181 (100), 331.1551 (50.4), 319.1549 (66.3),<br>301.1446 (6.1), 289.1440 (0.5), 277.1442 (1.3), 219.0649<br>(0.8), 193.0499 (2.8), 179.0338 (4.7), 153.0541 (4.5),<br>137.0593 (3.3), 109.0693 (3.7)<br>427.1763 (22.3), 273.1131 (3.9), 261.1129 (100),<br>243.1017 (0.4), 217.1223 (4.0), 199.1114 (0.5), 191.0701<br>(1.6), 153.0543 (46.5), 109.0643 (43.1)<br>483.2388 (89.2), 315.1600 (78.8), 303.1601 (100),<br>273.1496 (1.8), 259.1699 (4.5), 191.0341 (9.1), 179.0338<br>(16.9), 167.0701 (3.7), 166.0259 (5.1), 123.0801 (17.0)<br>427.1762 (40.7), 273.1133 (15.0), 261.1129 (100),<br>217.1226 (2.6), 191.0702 (18.9), 153.0543 (18.9),<br>109.0642 (15.9)                                                                                                                                                                                                                                                                                                                                                                                                                                                                                                                                                                                            | 21.67                   | 0.368  | 3                      |                |
| 155.            | ethylpyrones <sup>b,c</sup>                                                      | C <sub>27</sub> H <sub>34</sub> O <sub>8</sub> | 485.2181      | 485.2181 (100), 331.1551 (50.4), 319.1549 (66.3),<br>301.1446 (6.1), 289.1440 (0.5), 277.1442 (1.3), 219.0649<br>(0.8), 193.0499 (2.8), 179.0338 (4.7), 153.0541 (4.5),<br>137.0593 (3.3), 109.0693 (3.7)<br>427.1763 (22.3), 273.1131 (3.9), 261.1129 (100),<br>243.1017 (0.4), 217.1223 (4.0), 199.1114 (0.5), 191.0701<br>(1.6), 153.0543 (46.5), 109.0643 (43.1)<br>483.2388 (89.2), 315.1600 (78.8), 303.1601 (100),<br>273.1496 (1.8), 259.1699 (4.5), 191.0341 (9.1), 179.0338<br>(16.9), 167.0701 (3.7), 166.0259 (5.1), 123.0801 (17.0)<br>427.1762 (40.7), 273.1133 (15.0), 261.1129 (100),<br>217.1226 (2.6), 191.0702 (18.9), 153.0543 (18.9),<br>109.0642 (15.9)                                                                                                                                                                                                                                                                                                                                                                                                                                                                                                                                                                                                                                                                                                                     | 21.97                   | -0.023 | 3                      |                |
| 156.            | Ethylpyrones C <sup>b,c</sup>                                                    | C <sub>24</sub> H <sub>28</sub> O <sub>7</sub> | 427.1762      | 427.1763 (22.3), 273.1131 (3.9), 261.1129 (100),<br>243.1017 (0.4), 217.1223 (4.0), 199.1114 (0.5), 191.0701<br>(1.6), 153.0543 (46.5), 109.0643 (43.1)<br>483.2388 (89.2), 315.1600 (78.8), 303.1601 (100),<br>273.1496 (1.8), 259.1699 (4.5), 191.0341 (9.1), 179.0338<br>(16.9), 167.0701 (3.7), 166.0259 (5.1), 123.0801 (17.0)<br>427.1762 (40.7), 273.1133 (15.0), 261.1129 (100),<br>217.1226 (2.6), 191.0702 (18.9), 153.0543 (18.9),<br>109.0642 (15.9)                                                                                                                                                                                                                                                                                                                                                                                                                                                                                                                                                                                                                                                                                                                                                                                                                                                                                                                                  | 22.13                   | 0.102  | 2                      |                |
| 157.            | isopropylpyrones <sup>b</sup>                                                    | C <sub>28</sub> H <sub>36</sub> O <sub>7</sub> | 483.2388      | 483.2388 (89.2), 315.1600 (78.8), 303.1601 (100),<br>273.1496 (1.8), 259.1699 (4.5), 191.0341 (9.1), 179.0338<br>(16.9), 167.0701 (3.7), 166.0259 (5.1), 123.0801 (17.0)<br>427.1762 (40.7), 273.1133 (15.0), 261.1129 (100),<br>217.1226 (2.6), 191.0702 (18.9), 153.0543 (18.9),<br>109.0642 (15.9)                                                                                                                                                                                                                                                                                                                                                                                                                                                                                                                                                                                                                                                                                                                                                                                                                                                                                                                                                                                                                                                                                             | 22.41                   | -0.055 | 3                      | [8]            |
| 158.            | Ethylpyrones C <sup>b,c</sup>                                                    | C <sub>24</sub> H <sub>28</sub> O <sub>7</sub> | 427.1762      | 427.1762 (40.7), 273.1133 (15.0), 261.1129 (100),<br>217.1226 (2.6), 191.0702 (18.9), 153.0543 (18.9),<br>109.0642 (15.9)                                                                                                                                                                                                                                                                                                                                                                                                                                                                                                                                                                                                                                                                                                                                                                                                                                                                                                                                                                                                                                                                                                                                                                                                                                                                         | 23.01                   | -0.038 | 2                      |                |
| Other compounds |                                                                                  |                                                |               |                                                                                                                                                                                                                                                                                                                                                                                                                                                                                                                                                                                                                                                                                                                                                                                                                                                                                                                                                                                                                                                                                                                                                                                                                                                                                                                                                                                                   |                         |        |                        |                |
| 159.            | gnaphaliol <i>O</i> -hexoside                                                    | C <sub>19</sub> H <sub>24</sub> O <sub>9</sub> | 395.1348      | 395.1323 (8.8), 377.1234 (0.3), 233.0814 (100),<br>189.0912 (8.1), 173.0595 (1.2), 147.0800 (4.0), 83.0121<br>(5.5)<br>251.1286 (48.7), 207.0382 (100), 179.1064 (1.8),<br>151.1115 (30.0), 113.0956 (90.1), 85.0642 (28.4)<br>399.1444 (11.8), 233.0814 (100), 189.0911 (7.1),<br>173.0594 (0.8), 153.0543 (61.3), 109.0643 (36.9)<br>399.1440 (14.7), 233.0813 (100), 189.0913 (4.7),<br>173.0597 (1.1), 153.0543 (49.2), 109.0643 (35.5)                                                                                                                                                                                                                                                                                                                                                                                                                                                                                                                                                                                                                                                                                                                                                                                                                                                                                                                                                       | 8.14                    | -6.316 | 2                      | [1]            |
| 160.            | micropyrone                                                                      | C <sub>14</sub> H <sub>20</sub> O <sub>4</sub> | 251.1289      | 251.1286 (48.7), 207.0382 (100), 179.1064 (1.8),<br>151.1115 (30.0), 113.0956 (90.1), 85.0642 (28.4)<br>399.1444 (11.8), 233.0814 (100), 189.0911 (7.1),<br>173.0594 (0.8), 153.0543 (61.3), 109.0643 (36.9)<br>399.1440 (14.7), 233.0813 (100), 189.0913 (4.7),<br>173.0597 (1.1), 153.0543 (49.2), 109.0643 (35.5)                                                                                                                                                                                                                                                                                                                                                                                                                                                                                                                                                                                                                                                                                                                                                                                                                                                                                                                                                                                                                                                                              | 9.12                    | -1.045 | 2                      | [6]            |
| 161.            | italipyrone 1                                                                    | C <sub>22</sub> H <sub>24</sub> O <sub>7</sub> | 399.1449      | 399.1444 (11.8), 233.0814 (100), 189.0911 (7.1),<br>173.0594 (0.8), 153.0543 (61.3), 109.0643 (36.9)<br>399.1440 (14.7), 233.0813 (100), 189.0913 (4.7),<br>173.0597 (1.1), 153.0543 (49.2), 109.0643 (35.5)                                                                                                                                                                                                                                                                                                                                                                                                                                                                                                                                                                                                                                                                                                                                                                                                                                                                                                                                                                                                                                                                                                                                                                                      | 17.33                   | -1.369 | 2                      | [1]            |
| 162.            | Italipyrone 2                                                                    | C <sub>22</sub> H <sub>24</sub> O <sub>7</sub> | 399.1449      | 399.1440 (14.7), 233.0813 (100), 189.0913 (4.7),<br>173.0597 (1.1), 153.0543 (49.2), 109.0643 (35.5)                                                                                                                                                                                                                                                                                                                                                                                                                                                                                                                                                                                                                                                                                                                                                                                                                                                                                                                                                                                                                                                                                                                                                                                                                                                                                              | 20.39                   | -2.231 | 2                      | [1]            |
| N <sup>o</sup>  | Identified/tentatively<br>annotated compound                                     | Molecular<br>formula                           | Exact<br>mass | Fragmentation pattern in (+) ESI-MS/MS                                                                                                                                                                                                                                                                                                                                                                                                                                                                                                                                                                                                                                                                                                                                                                                                                                                                                                                                                                                                                                                                                                                                                                                                                                                                                                                                                            | t <sub>R</sub><br>(min) | Δ ppm  | Level of<br>confidence | Reference<br>s |

| [M+H] <sup>+</sup> |                                           |                                                |          |                                                                                                                                                                                                                                                                      |       |        |   |      |
|--------------------|-------------------------------------------|------------------------------------------------|----------|----------------------------------------------------------------------------------------------------------------------------------------------------------------------------------------------------------------------------------------------------------------------|-------|--------|---|------|
| 163.               | 6-hydroxytremeton                         | C <sub>13</sub> H <sub>14</sub> O <sub>3</sub> | 219.1013 | 219.1013 (65.9), 201.0911 (14.8), 183.0804 (100), 165.0700 (17.6), 159.0804 (79.7), 157.646 (23.2), 144.0569 (27.6), 141.0697 (12.2), 131.0855 (9.2), 129.0702 (4.3), 115.0546 (7.2), 107.0494 (5.8), 91.0548 (12.7), 57.0343 (3.4)                                  | 7.21  | -1.373 | 3 | [9]  |
| 164.               | 2-isobutyryl-6-acetylprenylphloroglucinol | C <sub>17</sub> H <sub>22</sub> O <sub>6</sub> | 323.1481 | 323.1481 (22.5), 305.1378 (53.1), 287.1254 (0.5), 277.1429 (62.1), 267.0858 (24.9), 249.0754 (100), 221.0805 (34.7), 203.0701 (66.6), 185.0600 (3.5), 175.0750 (13.6), 161.0595 (10.4), 147.0807 (4.8), 135.0805 (8.6), 109.0284 (1.9), 91.0546 (1.5), 79.0547 (0.5) | 13.16 | -2.522 | 3 | [10] |
| 165.               | 2-isobutyryl-4-prenylphloroglucinol       | C <sub>15</sub> H <sub>20</sub> O <sub>4</sub> | 265.1431 | 265.1431 (34.3), 209.0807 (100), 191.0701 (32.7), 173.0598 (2.91), 163.0752 (15.8), 149.0597 (4.6), 135.0803 (3.7), 121.0649 (9.2), 113.0600 (2.2), 107.0859 (1.6), 93.0704 (1.3), 79.0548 (1.3)                                                                     | 17.68 | -1.379 | 3 | [10] |
| 166.               | 2-methylvaleryl-4-prenylphloroglucinol    | C <sub>17</sub> H <sub>24</sub> O <sub>4</sub> | 293.1741 | 293.1741 (9.8), 237.1118 (100), 219.1013 (28.0), 201.0910 (1.8), 191.1066 (3.6), 177.0909 (0.4), 163.0752 (2.4), 143.0853 (1.0), 131.0856 (1.6), 121.0650 (0.9), 107.0859 (0.7), 93.0705 (1.2), 91.0545 (1.8), 79.0551 (0.2)                                         | 18.28 | -2.066 | 3 | [10] |

<sup>a</sup> identified by comparison with an authentic standard; <sup>b</sup> reported for the first time in *H. italicum*; <sup>c</sup>-undescribed in the literature; A, B, C compounds labeled with the same capital letters share the same fragmentation patterns; Level of confidence: 1-compound identified by comparison to reference standard; 2-putatively annotated compound; 3- putatively characterized compound classes.

Table S2. Tentative structures of prenylated phloroglucinol  $\alpha$ -pyrones (for numbers and fragmentation patterns, see Table S1).

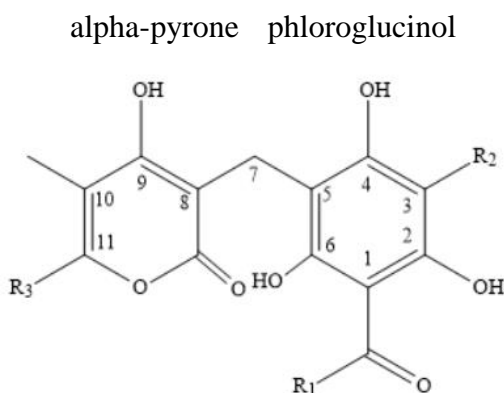

| N                            | R <sub>1</sub>                                         | R <sub>2</sub>                             | R <sub>3</sub>                     | [M-H] <sup>-</sup><br>Exact mass |
|------------------------------|--------------------------------------------------------|--------------------------------------------|------------------------------------|----------------------------------|
| <b>Methylpyrones (MP)</b>    |                                                        |                                            |                                    |                                  |
| <b>131</b>                   | CH <sub>3</sub>                                        | Prenyl(C <sub>5</sub> H <sub>9</sub> )     | CH <sub>3</sub>                    | 387.1449                         |
| <b>148</b>                   | CH <sub>3</sub>                                        | Geranyl (C <sub>10</sub> H <sub>17</sub> ) | CH <sub>3</sub>                    | 455.2075                         |
| <b>Ethylpyrones (EP)</b>     |                                                        |                                            |                                    |                                  |
| <b>135</b>                   | CH <sub>3</sub>                                        | Prenyl                                     | -CH <sub>2</sub> -CH <sub>3</sub>  | 401.1606                         |
| <b>141</b>                   | -CH <sub>2</sub> -CH <sub>3</sub>                      | Prenyl                                     | -CH <sub>2</sub> -CH <sub>3</sub>  | 415.1751                         |
| <b>146</b>                   | -CH(CH <sub>3</sub> ) <sub>2</sub>                     | Prenyl                                     | -CH <sub>2</sub> -CH <sub>3</sub>  | 429.1919                         |
| <b>151</b>                   | CH(CH <sub>3</sub> )-CH <sub>2</sub> -CH <sub>3</sub>  | Prenyl                                     | -CH <sub>2</sub> -CH <sub>3</sub>  | 443.2075                         |
| <b>127</b>                   | CH <sub>3</sub>                                        | Hydroxyprenyl                              | -CH <sub>2</sub> -CH <sub>3</sub>  | 417.1555                         |
| <b>140</b>                   | CH <sub>3</sub>                                        | Hydroxyprenyl                              | -CH <sub>2</sub> -CH <sub>3</sub>  | 417.1555                         |
| <b>147</b>                   | -CH <sub>2</sub> -CH <sub>3</sub>                      | Hydroxyprenyl                              | -CH <sub>2</sub> -CH <sub>3</sub>  | 431.1711                         |
| <b>152</b>                   | -CH(CH <sub>3</sub> ) <sub>2</sub>                     | Hydroxyprenyl                              | -CH <sub>2</sub> -CH <sub>3</sub>  | 445.1868                         |
| <b>138</b>                   | -CH(CH <sub>3</sub> )-CH <sub>2</sub> -CH <sub>3</sub> | Hydroxyprenyl                              | -CH <sub>2</sub> -CH <sub>3</sub>  | 459.2024                         |
| <b>154</b>                   | -CH(CH <sub>3</sub> )-CH <sub>2</sub> -CH <sub>3</sub> | Hydroxyprenyl                              | -CH <sub>2</sub> -CH <sub>3</sub>  | 459.2024                         |
| <b>153</b>                   | CH <sub>3</sub>                                        | Geranyl                                    | -CH <sub>2</sub> -CH <sub>3</sub>  | 469.2232                         |
| <b>132</b>                   | CH <sub>3</sub>                                        | Hydroxygeranyl                             | -CH <sub>2</sub> -CH <sub>3</sub>  | 485.2181                         |
| <b>136</b>                   | CH <sub>3</sub>                                        | Hydroxygeranyl                             | -CH <sub>2</sub> -CH <sub>3</sub>  | 485.2181                         |
| <b>155</b>                   | CH <sub>3</sub>                                        | Hydroxygeranyl                             | -CH <sub>2</sub> -CH <sub>3</sub>  | 485.2181                         |
| <b>128</b>                   | CH <sub>3</sub>                                        | Dihydroxyprenyl                            | -CH <sub>2</sub> -CH <sub>3</sub>  | 433.1504                         |
| <b>134</b>                   | -CH <sub>2</sub> -CH <sub>3</sub>                      | Dihydroxyprenyl                            | -CH <sub>2</sub> -CH <sub>3</sub>  | 447.1661                         |
| <b>156</b>                   | -CH(CH <sub>3</sub> ) <sub>2</sub>                     | -C <sub>5</sub> H <sub>7</sub>             | -CH <sub>2</sub> -CH <sub>3</sub>  | 427.1762                         |
| <b>158</b>                   | -CH(CH <sub>3</sub> ) <sub>2</sub>                     | -C <sub>5</sub> H <sub>7</sub>             | -CH <sub>2</sub> -CH <sub>3</sub>  | 427.1762                         |
| <b>142</b>                   | -C <sub>3</sub> H <sub>5</sub> OH                      | Prenyl                                     | -CH <sub>2</sub> -CH <sub>3</sub>  | 443.1711                         |
| <b>Isopropylpyrones(IPP)</b> |                                                        |                                            |                                    |                                  |
| <b>139</b>                   | CH <sub>3</sub>                                        | Prenyl                                     | -CH(CH <sub>3</sub> ) <sub>2</sub> | 415.1751                         |
| <b>157</b>                   | CH <sub>3</sub>                                        | Geranyl                                    | -CH(CH <sub>3</sub> ) <sub>2</sub> | 483.2388                         |
| <b>144</b>                   | CH <sub>3</sub>                                        | Hydroxyprenyl                              | -CH(CH <sub>3</sub> ) <sub>2</sub> | 431.1711                         |

|                                     |                 |                               |                                                            |          |
|-------------------------------------|-----------------|-------------------------------|------------------------------------------------------------|----------|
| <b>130</b>                          | CH <sub>3</sub> | Dihydroxyprenyl               | -CH(CH <sub>3</sub> ) <sub>2</sub>                         | 447.1661 |
| <b>1-Methyl-propylpyrones (MPP)</b> |                 |                               |                                                            |          |
| <b>150</b>                          | CH <sub>3</sub> | C <sub>5</sub> H <sub>7</sub> | -CH(CH <sub>3</sub> )-<br>CH <sub>2</sub> -CH <sub>3</sub> | 427.1762 |
| <b>149</b>                          | CH <sub>3</sub> | Hydroxyprenyl                 | -CH(CH <sub>3</sub> )-<br>CH <sub>2</sub> -CH <sub>3</sub> | 445.1868 |
| <b>143</b>                          | CH <sub>3</sub> | Prenyl                        | -CH(CH <sub>3</sub> )-<br>CH <sub>2</sub> -CH <sub>3</sub> | 429.1919 |

## References

1. Kramberger, K.; Barlič-Maganja, D.; Bandelj, D.; Baruca Arbeiter, A.; Peeters, K.; Miklavčič Višnjevec, A.; Jenko Pražnikar, Z., HPLC-DAD-ESI-QTOF-MS determination of bioactive compounds and antioxidant activity comparison of the hydroalcoholic and water extracts from two *Helichrysum italicum* species. *Metabolites* **2020**, 10, (10), 403.
2. Pereira, C. G.; Barreira, L.; Bitttebier, S.; Pieters, L.; Neves, V.; Rodrigues, M. J.; Rivas, R.; Varela, J.; Custodio, L., Chemical profiling of infusions and decoctions of *Helichrysum italicum* subsp. *picardii* by UHPLC-PDA-MS and in vitro biological activities comparatively with green tea (*Camellia sinensis*) and rooibos tisane (*Aspalathus linearis*). *Journal of Pharmaceutical and biomedical analysis* **2017**, 145, 593-603.
3. Appendino, G.; Ottino, M.; Marquez, N.; Bianchi, F.; Giana, A.; Ballero, M.; Sterner, O.; Fiebich, B. L.; Munoz, E., Arzanol, an anti-inflammatory and anti-HIV-1 phloroglucinol  $\alpha$ -pyrone from *Helichrysum italicum* ssp. *microphyllum*. *Journal of natural products* **2007**, 70, (4), 608-612.
4. Akaberi, M.; Sahebkar, A.; Azizi, N.; Emami, S. A., Everlasting flowers: Phytochemistry and pharmacology of the genus *Helichrysum*. *Industrial Crops and Products* **2019**, 138, 111471.
5. Jakupovic, J.; Kuhnke, J.; Schuster, A.; Metwally, M.; Bohlmann, F., Phloroglucinol derivatives and other constituents from South African *Helichrysum* species. *Phytochemistry* **1986**, 25, (5), 1133-1142.
6. Taglialatela-Scafati, O.; Pollastro, F.; Chianese, G.; Minassi, A.; Gibbons, S.; Arunotayanun, W.; Mabebie, B.; Ballero, M.; Appendino, G., Antimicrobial phenolics and unusual glycerides from *Helichrysum italicum* subsp. *microphyllum*. *Journal of natural products* **2013**, 76, (3), 346-353.
7. Tomás-Lorente, F.; Iniesta-Sanmartín, E.; Tomás-Barberán, F. A.; Trowitzsch-Kienast, W.; Wray, V., Antifungal phloroglucinol derivatives and lipophilic flavonoids from *Helichrysum decumbens*. *Phytochemistry* **1989**, 28, (6), 1613-1615.
8. Akaberi, M.; Danton, O.; Tayarani-Najaran, Z.; Asili, J.; Iranshahi, M.; Emami, S. A.; Hamburger, M., HPLC-based activity profiling for antiprotozoal compounds in the endemic Iranian medicinal plant *Helichrysum ocephalum*. *Journal of natural products* **2019**, 82, (4), 958-969.
9. Bohlmann, F.; Hoffmann, E., Cannabigerol-ähnliche verbindungen aus *Helichrysum umbraculigerum*. *Phytochemistry* **1979**, 18, (8), 1371-1374.

10. Lourens, A.; Viljoen, A. M.; Van Heerden, F., South African *Helichrysum* species: a review of the traditional uses, biological activity and phytochemistry. *Journal of Ethnopharmacology* **2008**, 119, (3), 630-652.
